# Supplementary material
Source: PubMed Central journal article supplement (PMC4395007)
Supplement: NIHMS674116-supplement-Supplemental.pdf [file NIHMS674116-supplement-Supplemental.pdf]

## Supplementary Notes

### Acknowledgements

We thank the participants in the CAPRISA 002 study for their commitment in attending the CAPRISA clinics in eThekweni and Vulindlela, South Africa each month for several years. Thanks also to Drs. Koleka Mlisana, Dr. Sengeziwe Sibeko, Dr. Nivashnee Naicker and the CAPRISA 002 clinical team and Ms. Natasha Samsunder and Ms. Shannie Herall in the CAPRISA laboratory. At NICD, we thank Drs. Bronwen Lambson, Mashudu Madzivhandila and Thandeka Khoza for technical help with SGA, viral sequencing and antibody production, and Cathrine Mitchell for germline VH allele identification. We thank Ellen Turk and Chien-Li Lin for technical assistance with large neutralization panels, Jonathan Stuckey and Brenda Hartman for assistance with figures, and members of the Structural Biology Section, Structural Bioinformatics Core Section, and Humoral Immunology Core and Section, Vaccine Research Center, National Institute of Allergy and Infectious Diseases (NIAID), National Institutes for Health (NIH), for comments and suggestions on the manuscript. We thank J. Baalwa, D. Ellenberger, F. Gao, B. Hahn, K. Hong, J. Kim, F. McCutchan, D. Montefiori, L. Morris, J. Overbaugh, E. Sanders-Buell, G. Shaw, R. Swanstrom, M. Thomson, S. Tovanabutra, C. Williamson, and L. Zhang for contributing the HIV-1 Envelope plasmids used in our neutralization panel. Thanks to Glaudina Loots of the Department of Science and Technology for the support that enabled the long-term follow-up on participant CAP256. We thank the WCMC HIVRAD Core for providing trimers and J.H. Lee for insights and technical assistance with EM data processing and analysis. We thank Gregory Ippolito for help and

advice, Bryan Briney for use of an unpublished hVL3 primer, and Scott Hunicke-Smith and Jessica Wheeler for MiSeq sequencing.

Support for this work was provided by the Intramural Research Program of the Vaccine Research Center, National Institute of Allergy and Infectious Diseases and the National Human Genome Research Institute, National Institutes of Health (NIH) and by the Neutralizing Antibody Consortium of the International AIDS Vaccine Initiative. JNB, PLM and LM were recipients of Columbia University-Southern African Fogarty AIDS International Training and Research Program (AITRP) administered through the Fogarty International Center, National Institutes of Health (NIH grant# 5 D43 TW000231). JNB received a University of the Witwatersrand Post-graduate Merit Award as well as a bursary from the Poliomyelitis Research Foundation. CKW received bursary funding from the National Research Foundation and the Poliomyelitis Research Foundation. PLM is a Wellcome Trust Intermediate Fellow in Public Health and Tropical Medicine (Grant 089933/Z/09/Z). Use of sector 22 (Southeast Region Collaborative Access team) at the Advanced Photon Source was supported by the US Department of Energy, Basic Energy Sciences, Office of Science, under contract number W-31-109-Eng-38. Studies on the CAPRISA cohort were supported by NIAID, NIH, and U.S. Department of Health and Human Services (Grant U19 AI51794) and the South African Department of Science and Technology. The EM work was supported by HIVRAD P01 AI82362 (J.P.M., I.A.W., and A.B.W.), IAVI and Scripps CHAV-ID and conducted at the National Resource for Automated Molecular Microscopy at The Scripps Research Institute, which is supported by the U. S. NIH NIGMS Biomedical Technology Research Center program (GM103310). Funding for the heavy-light chain paired sequencing was

provided by fellowships to B.J.D. from the Hertz Foundation, the University of Texas Donald D. Harrington Foundation and the National Science Foundation, and by the University of Texas Cockrell Family Regents Chair in Engineering (G.G.).

### **NISC Comparative Sequencing Program**

Jesse Becker<sup>1</sup>, Betty Benjamin<sup>1</sup>, Robert Blakesley<sup>1</sup>, Gerry Bouffard<sup>1</sup>, Shelise Brooks<sup>1</sup>, Holly Coleman<sup>1</sup>, Mila Dekhtyar<sup>1</sup>, Michael Gregory<sup>1</sup>, Xiaobin Guan<sup>1</sup>, Jyoti Gupta<sup>1</sup>, Joel Han<sup>1</sup>, April Hargrove<sup>1</sup>, Shi-ling Ho<sup>1</sup>, Taccara Johnson<sup>1</sup>, Richelle Legaspi<sup>1</sup>, Sean Lovett<sup>1</sup>, Quino Maduro<sup>1</sup>, Cathy Masiello<sup>1</sup>, Baishali Maskeri<sup>1</sup>, Jenny McDowell<sup>1</sup>, Casandra Montemayor<sup>1</sup>, James Mullikin<sup>1</sup>, Morgan Park<sup>1</sup>, Nancy Riebow<sup>1</sup>, Karen Schandler<sup>1</sup>, Brian Schmidt<sup>1</sup>, Christina Sison<sup>1</sup>, Mal Stantripop<sup>1</sup>, James Thomas<sup>1</sup>, Pam Thomas<sup>1</sup>, Meg Vemulapalli<sup>1</sup> & Alice Young<sup>1</sup>

<sup>1</sup>NISC Comparative Sequencing Program, NIH, Bethesda, Maryland 20892, USA.

# Supplementary Figure 1

| Virus ID        | Clade | VRC26.01 | VRC26.03 | VRC26.06 | VRC26.08 |
|-----------------|-------|----------|----------|----------|----------|
| 0260.v5.c36     | A     | >50      | >50      | >50      | >50      |
| 0330.v4.c3      | A     | >50      | >50      | >50      | >50      |
| 0439.v5.c1      | A     | >50      | >50      | >50      | >50      |
| 3365.v2.c20     | A     | >50      | 20.8     | >50      | 0.100    |
| 3415.v1.c1      | A     | >50      | >50      | >50      | >50      |
| 3718.v3.c11     | A     | >50      | 0.377    | >50      | 0.105    |
| 398-F1_F6_20    | A     |          | >50      | >50      | >50      |
| BB201.B42       | A     | >50      | 0.001    | 1.38     | 0.001    |
| BB539.2B13      | A     | >50      | 35.7     | >50      | 0.194    |
| BI369.9A        | A     | 1.01     | 0.051    | 28.6     | 0.008    |
| BS208.B1        | A     | 16.7     | 0.009    | >50      | 0.003    |
| KER2008.12      | A     | 0.308    | >50      | >50      | >50      |
| KER2018.11      | A     | 5.95     | 0.014    | 42.7     | 0.003    |
| KNH1209.18      | A     | >50      | >50      | >50      | >50      |
| MB201.A1        | A     | >50      | >50      | >50      | >50      |
| MB539.2B7       | A     | >50      | >50      | >50      | 31.9     |
| MI369.A5        | A     | >50      | 7.88     | >50      | 0.039    |
| MS208.A1        | A     | >50      | 19.0     | >50      | 0.115    |
| Q23.17          | A     | >50      | 0.867    | >50      | 0.010    |
| Q259.17         | A     | >50      | 0.002    | >50      | 0.001    |
| Q769.d22        | A     | >50      | >50      | >50      | >50      |
| Q769.h5         | A     | >50      | >50      |          |          |
| Q842.d12        | A     | >50      | >50      | >50      | >50      |
| QH209.14M.A2    | A     | >50      | >50      | >50      | >50      |
| RW020.2         | A     | >50      | >50      | >50      | >50      |
| UG037.8         | A     | >50      | >50      | >50      | >50      |
| 3301.V1.C24     | AC    | 2.78     | 0.047    | 2.92     | 0.013    |
| 3589.V1.C4      | AC    | >50      | >50      | >50      | >50      |
| 6540.v4.c1      | AC    | >50      | 0.892    | >50      | 0.077    |
| 6545.V4.C1      | AC    | >50      | 6.14     | >50      | 0.026    |
| 0815.V3.C3      | ACD   | >50      | >50      | >50      | >50      |
| 6095.V1.C10     | ACD   | 2.32     | 0.434    | >50      | 0.0007   |
| 3468.V1.C12     | AD    | >50      | >50      | >50      | >50      |
| Q168.a2         | AD    | >50      | >50      | >50      | 0.148    |
| Q461.e2         | AD    | >50      | >50      | >50      | 0.502    |
| 620345.c1       | AE    | 42.9     | 0.394    | >50      | 0.001    |
| BJOX009000.02.4 | AE    | >50      | >50      | >50      | >50      |
| BJOX010000.06.2 | AE    | >50      | >50      | >50      | >50      |
| BJOX025000.01.1 | AE    | >50      | >50      | >50      | >50      |
| BJOX028000.10.3 | AE    |          | >50      | >50      | >50      |
| C1080.c3        | AE    | >50      | 0.006    | >50      | 0.023    |
| C2101.c1        | AE    | >50      | >50      | >50      | >50      |
| C3347.c11       | AE    |          | >50      | >50      | >50      |
| C4118.09        | AE    | 3.64     | 0.010    | >50      | 0.002    |
| CM244.ec1       | AE    |          | 0.0007   | 6.90     | 0.002    |
| CNE3            | AE    | >50      | >50      | >50      | >50      |
| CNE5            | AE    | 2.21     | 0.004    | >50      | 0.020    |
| CNE55           | AE    | >50      | 0.019    | >50      | 0.026    |
| CNE56           | AE    | >50      | >50      | >50      | >50      |
| CNE59           | AE    | >50      | >50      | >50      | >50      |

| Virus ID  | Clade | VRC26.01 | VRC26.03 | VRC26.06 | VRC26.08 |
|-----------|-------|----------|----------|----------|----------|
| CNE8      | AE    |          | >50      | >50      | 2.46     |
| M02138    | AE    | >50      | >50      | >50      | >50      |
| R1166.c1  | AE    | >50      | >50      | >50      | >50      |
| R2184.c4  | AE    | >50      | >50      | >50      | 19.8     |
| R3265.c6  | AE    |          | >50      | >50      | >50      |
| TH023.6   | AE    |          | >50      | >50      | 26.4     |
| TH966.8   | AE    | >50      | 0.016    | >50      | 0.036    |
| TH976.17  | AE    | >50      | 2.95     | >50      | >50      |
| 235-47    | AG    | >50      | >50      | >50      | 0.265    |
| 242-14    | AG    | >50      | 0.062    | >50      | 0.0003   |
| 263-8     | AG    | >50      | >50      | >50      | 0.031    |
| 269-12    | AG    | >50      | >50      | >50      | >50      |
| 271-11    | AG    | >50      | >50      | >50      | >50      |
| 928-28    | AG    | >50      | 3.60     | >50      | 0.097    |
| DJ263.8   | AG    | 1.16     | 0.138    | >50      | 0.031    |
| T250-4    | AG    | 0.018    | 0.0004   | 4.74     | 0.001    |
| T251-18   | AG    | >50      | >50      | >50      | >50      |
| T253-11   | AG    | >50      | >50      | >50      | 49.5     |
| T255-34   | AG    | >50      | >50      | >50      | >50      |
| T257-31   | AG    | 11.0     | 0.004    | >50      | 0.009    |
| T266-60   | AG    | >50      | 0.943    | >50      | 1.78     |
| T278-50   | AG    | >50      | >50      | >50      | >50      |
| T280-5    | AG    | >50      | >50      | >50      | >50      |
| T33-7     | AG    | >50      | >50      | >50      | >50      |
| 3988.25   | B     | >50      | >50      | >50      | >50      |
| 5768.04   | B     | >50      | >50      | >50      | >50      |
| 6101.10   | B     | >50      | >50      | >50      | >50      |
| 6535.3    | B     | >50      | >50      | >50      | >50      |
| 7165.18   | B     | >50      | >50      | >50      | >50      |
| 45_01dG5  | B     |          | >50      | 0.877    | >50      |
| 89.6.DG   | B     | >50      | >50      | >50      | >50      |
| AC10.29   | B     | >50      | >50      | 0.030    | >50      |
| ADA.DG    | B     | >50      | >50      | 12.5     | >50      |
| Bal.01    | B     | >50      | >50      | >50      | >50      |
| BaL.26    | B     | >50      | >50      | >50      | >50      |
| BG1168.01 | B     | >50      | >50      | >50      | >50      |
| BL01.DG   | B     | >50      | >50      | >50      | >50      |
| BR07.DG   | B     | >50      | >50      | >50      | >50      |
| BX08.16   | B     | >50      | >50      | 12.6     | >50      |
| CAAN.A2   | B     | >50      | >50      | >50      | >50      |
| CNE10     | B     | >50      | >50      | >50      | >50      |
| CNE12     | B     | >50      | >50      | >50      | >50      |
| CNE14     | B     | >50      | >50      | >50      | >50      |
| CNE4      | B     | >50      | >50      | >50      | >50      |
| CNE57     | B     | >50      | >50      | >50      | >50      |
| HO86.8    | B     | >50      | >50      | >50      | >50      |
| HT593.1   | B     | >50      | >50      | >50      | >50      |
| HXB2.DG   | B     | >50      | >50      | >50      | >50      |
| JRCSF.JB  | B     | >50      | >50      | >50      | >50      |
| JRFL.JB   | B     | >50      | >50      | >50      | >50      |

Supplementary Figure 1. Neutralization by CAP256-VRC26 antibodies of 194 Env-pseudoviruses.

# Supplementary Figure 1

| Virus ID     | Clade | VRC26.01 | VRC26.03 | VRC26.06 | VRC26.08 |
|--------------|-------|----------|----------|----------|----------|
| MN.3         | B     | >50      | >50      | >50      | >50      |
| PVO.04       | B     | >50      | >50      | 0.947    | 11.8     |
| QH0515.01    | B     | >50      | >50      | >50      | >50      |
| QH0692.42    | B     | >50      | >50      | >50      | >50      |
| REJO.67      | B     | >50      | >50      | >50      | >50      |
| RHPA.7       | B     | >50      | >50      | >50      | >50      |
| SC422.8      | B     | >50      | >50      | 0.439    | >50      |
| SF162.LS     | B     | >50      | >50      | >50      | >50      |
| SS1196.01    | B     | >50      | >50      | >50      | >50      |
| THRO.18      | B     | >50      | >50      | 3.30     | >50      |
| TRJO.58      | B     | >50      | >50      | >50      | >50      |
| TRO.11       | B     | >50      | >50      | >50      | >50      |
| WITO.33      | B     | >50      | >50      | 0.005    | >50      |
| YU2.DG       | B     | >50      | >50      | >50      | >50      |
| CH038.12     | BC    | 9.82     | 0.020    | 1.44     | 0.009    |
| CH070.1      | BC    | >50      | 0.553    | >50      | 0.039    |
| CH117.4      | BC    | 15.8     | 0.002    | 0.741    | 0.003    |
| CH181.12     | BC    | 0.017    | 0.001    | 0.049    | 0.001    |
| CNE15        | BC    | >50      | >50      | >50      | >50      |
| CNE19        | BC    |          |          | >50      | 11.1     |
| CNE20        | BC    | >50      | >50      | >50      | >50      |
| CNE21        | BC    | >50      | 0.021    | >50      | 0.001    |
| CNE40        | BC    | >50      | >50      | >50      | >50      |
| CNE7         | BC    | 10.2     | 0.829    | >50      | 0.003    |
| 286.36       | C     | 0.281    | 0.008    | 0.559    | 0.004    |
| 288.38       | C     | >50      | >50      | >50      | >50      |
| 0013095-2.11 | C     | >50      | >50      | >50      | 0.021    |
| 001428-2.42  | C     | >50      | 0.010    | >50      | 30.9     |
| 0077_V1.C16  | C     | 10.8     | 0.032    | >50      | 0.001    |
| 00836-2.5    | C     | >50      | >50      | >50      | >50      |
| 0921.V2.C14  | C     | >50      | 0.048    | >50      | 0.036    |
| 16055-2.3    | C     | 0.016    | 0.004    | 0.504    | 0.004    |
| 16845-2.22   | C     | >50      | >50      | >50      | >50      |
| 16936-2.21   | C     | >50      | 0.748    | >50      | 0.250    |
| 25710-2.43   | C     | >50      | 0.017    | >50      | 0.006    |
| 25711-2.4    | C     | >50      | >50      | >50      | >50      |
| 25925-2.22   | C     | >50      | 0.021    | >50      | 0.013    |
| 26191-2.48   | C     | 13.3     | 0.004    | >50      | 0.001    |
| 3168.V4.C10  | C     | >50      | >50      | >50      | >50      |
| 3637.V5.C3   | C     | >50      | >50      | >50      | >50      |
| 3873.V1.C24  | C     | 0.677    | 0.017    | >50      | 0.004    |
| 6322.V4.C1   | C     | 16.5     | 0.007    | >50      | 0.003    |
| 6471.V1.C16  | C     | >50      | >50      | >50      | >50      |
| 6631.V3.C10  | C     | >50      | >50      | >50      | >50      |
| 6644.V2.C33  | C     | >50      | >50      | >50      | >50      |
| 6785.V5.C14  | C     | 1.68     | 0.005    | 2.54     | 0.005    |
| 6838.V1.C35  | C     | >50      | 0.006    | >50      | 0.001    |
| 96ZM651.02   | C     | >50      | >50      | >50      | 2.63     |
| BR025.9      | C     | >50      | >50      | >50      | >50      |
| CAP210.E8    | C     | 0.166    | 0.011    | 1.20     | 0.030    |

| Virus ID       | Clade | VRC26.01 | VRC26.03 | VRC26.06 | VRC26.08 |
|----------------|-------|----------|----------|----------|----------|
| CAP244.D3      | C     | >50      | >50      | >50      | 46.0     |
| CAP45.G3       | C     | 31.8     | 10.7     | >50      | 4.69     |
| CNE30          | C     | >50      | >50      | >50      | >50      |
| CNE31          | C     | >50      | >50      | >50      | >50      |
| CNE53          | C     | >50      | >50      | >50      | >50      |
| CNE58          | C     | 0.749    | 0.100    | >50      | 0.006    |
| DU123.06       | C     | >50      | >50      | >50      | 0.015    |
| DU151.02       | C     | >50      | 0.361    | >50      | 0.006    |
| DU156.12       | C     | >50      | 0.090    | >50      | 0.006    |
| DU172.17       | C     | >50      | >50      | >50      | >50      |
| DU422.01       | C     | >50      | 0.224    | >50      | 1.12     |
| MW965.26       | C     | 14.9     | 0.218    | >50      | 0.003    |
| SO18.18        | C     | 0.046    | 0.004    | 0.046    | 0.002    |
| TV1.29         | C     |          | >50      | >50      | >50      |
| TZA125.17      | C     | >50      | >50      | >50      | 0.018    |
| TZBD.02        | C     | >50      | 0.014    | >50      | 0.036    |
| ZA012.29       | C     | >50      | >50      | >50      | >50      |
| ZM106.9        | C     | >50      | 0.015    | >50      | 0.010    |
| ZM109.4        | C     | >50      | >50      | >50      | >50      |
| ZM135.10a      | C     | >50      | >50      | >50      | >50      |
| ZM176.66       | C     | >50      | 0.017    | >50      | 0.029    |
| ZM197.7        | C     | 22.1     | 0.302    | >50      | 0.002    |
| ZM214.15       | C     | >50      | 0.100    | >50      | 3.23     |
| ZM215.8        | C     | >50      | >50      | >50      | >50      |
| ZM233.6        | C     | 0.701    | 0.032    | 22.6     | 0.0003   |
| ZM249.1        | C     | >50      | 0.004    | >50      | 0.0009   |
| ZM53.12        | C     | 0.036    | 0.017    | 0.082    | 0.004    |
| ZM55.28a       | C     | 40.9     | 0.027    | >50      | 0.005    |
| 3326.V4.C3     | CD    | 0.029    | 0.011    | 0.226    | 0.007    |
| 3337.V2.C6     | CD    | >50      | 0.012    | >50      | 0.044    |
| 3817.v2.c59    | CD    | >50      | >50      | >50      | >50      |
| 191821.E6.1    | D     | >50      | 1.50     | >50      | 0.003    |
| 231965.c1      | D     | >50      | >50      | >50      | >50      |
| 247-23         | D     | >50      | >50      | >50      | 0.005    |
| 3016.v5.c45    | D     | 16.4     | 0.450    | >50      | 0.005    |
| 57128.vrc15    | D     | >50      | >50      | >50      | >50      |
| 6405.v4.c34    | D     | >50      | >50      | >50      | >50      |
| A03349M1.vrc4a | D     | >50      | >50      | >50      | 2.68     |
| A07412M1.vrc12 | D     |          | 33.7     | >50      | 0.068    |
| NKU3006.ec1    | D     | >50      | >50      | >50      | >50      |
| UG024.2        | D     | >50      | >50      | >50      | 0.843    |
| P0402.c2.11    | G     |          | 0.100    | >50      | 0.006    |
| P1981.C5.3     | G     | >50      | 0.045    | >50      | 0.008    |
| X1193.c1       | G     | >50      | 9.68     | >50      | 0.343    |
| X1254.c3       | G     | >50      | >50      | >50      | >50      |
| X1632.S2.B10   | G     | >50      | 0.034    | >50      | 0.010    |
| X2088.c9       | G     | >50      | >50      | >50      | >50      |

| % of viruses neutralized                    | 18%  | 38%   | 12%  | 47%   |
|---------------------------------------------|------|-------|------|-------|
| median IC50 for neutralized viruses         | 2.55 | 0.032 | 1.20 | 0.013 |
| geometric mean IC50 for neutralized viruses | 1.74 | 0.065 | 1.06 | 0.029 |

| Clade | Virus      | Combined     |                      |       |       |        |
|-------|------------|--------------|----------------------|-------|-------|--------|
|       |            | CAP256-VRC26 | CAP256 plasma (ID50) |       |       |        |
|       |            | mAbs (IC50)  | wk 59                | wk106 | wk159 | wk 220 |
| C     | ZM53.12    | 0.002        | 979                  | 14218 | 13474 | 15460  |
|       | ZM233.6    | 0.0003       | 238                  | 4360  | 13476 | 5261   |
|       | CAP210.E8  | 0.002        | 7091                 | 7830  | 13580 | 5250   |
|       | DU422.01   | 0.008        | <45                  | 346   | 1907  | 1968   |
|       | ZM197.7    | 0.008        | <45                  | 151   | 1062  | 1245   |
|       | DU156.12   | 0.016        | <45                  | 394   | 1363  | 1116   |
|       | CAP45.G3   | 4.7          | 287                  | 7898  | 13402 | 1006   |
|       | ZM214.15   | 0.33         | <45                  | <45   | 920   | 538    |
|       | ZM109.4    | 26.5         | <45                  | 70    | 398   | 156    |
|       | ZM249.1    | 0.010        | <45                  | <45   | 230   | 119    |
|       | CAP244.D3  | >50          | <45                  | <45   | 58    | 62     |
|       | DU172.17   | >50          | <45                  | <45   | <45   | <45    |
|       | ZM135.10a  | >50          | <45                  | 68    | 69    | <45    |
| A     | Q842.d12   | 10.1         | <45                  | 47    | 658   | 602    |
|       | Q23.17     | 9.5          | <45                  | 171   | 1107  | 448    |
|       | Q259.d2.17 | 0.008        | <45                  | 792   | 114   | 433    |
|       | Q168.a2    | 0.181        | <45                  | 70    | 2349  | 352    |
|       | Q461.e2    | 0.705        | <45                  | <45   | 422   | 127    |
|       | Q769.d22   | >50          | <45                  | <45   | <45   | <45    |
| B     | 6535.3     | >50          | <45                  | 214   | 788   | 284    |
|       | WITO.33    | 0.003        | 56                   | 219   | 293   | 99     |
|       | TRO.11     | >50          | <45                  | <45   | <45   | 69     |
|       | AC10.29    | 0.022        | <45                  | 64    | 48    | 66     |
|       | RHPA.7     | >50          | <45                  | <45   | <45   | 49     |
|       | PVO.04     | 0.308        | 47                   | 53    | 86    | 47     |
|       | CAAN.A2    | >50          | <45                  | <45   | <45   | <45    |
|       | QH0692.42  | >50          | <45                  | <45   | 49    | <45    |
|       | REJO.67    | >50          | <45                  | <45   | <45   | <45    |
|       | SC422.8    | 0.178        | <45                  | <45   | <45   | <45    |
|       | THRO.18    | 4.250        | <45                  | <45   | <45   | <45    |
|       | TRJO.58    | >50          | <45                  | <45   | 56    | <45    |

**Supplementary Figure 2. Neutralization of heterologous viruses by CAP256 plasma and mAbs.** Neutralization of 31 viruses by CAP256-VRC26 antibodies and by plasma from CAP256 sampled at 4 timepoints. Plasma data are from ref. 25. Antibody values are shown as 50% inhibitory concentration (IC50) of a theoretical combination of all 12 antibodies (calculated as the lowest IC50 for each virus). Plasma is shown as 50% inhibitory dilution (ID50) with a starting dilution of 1:45.



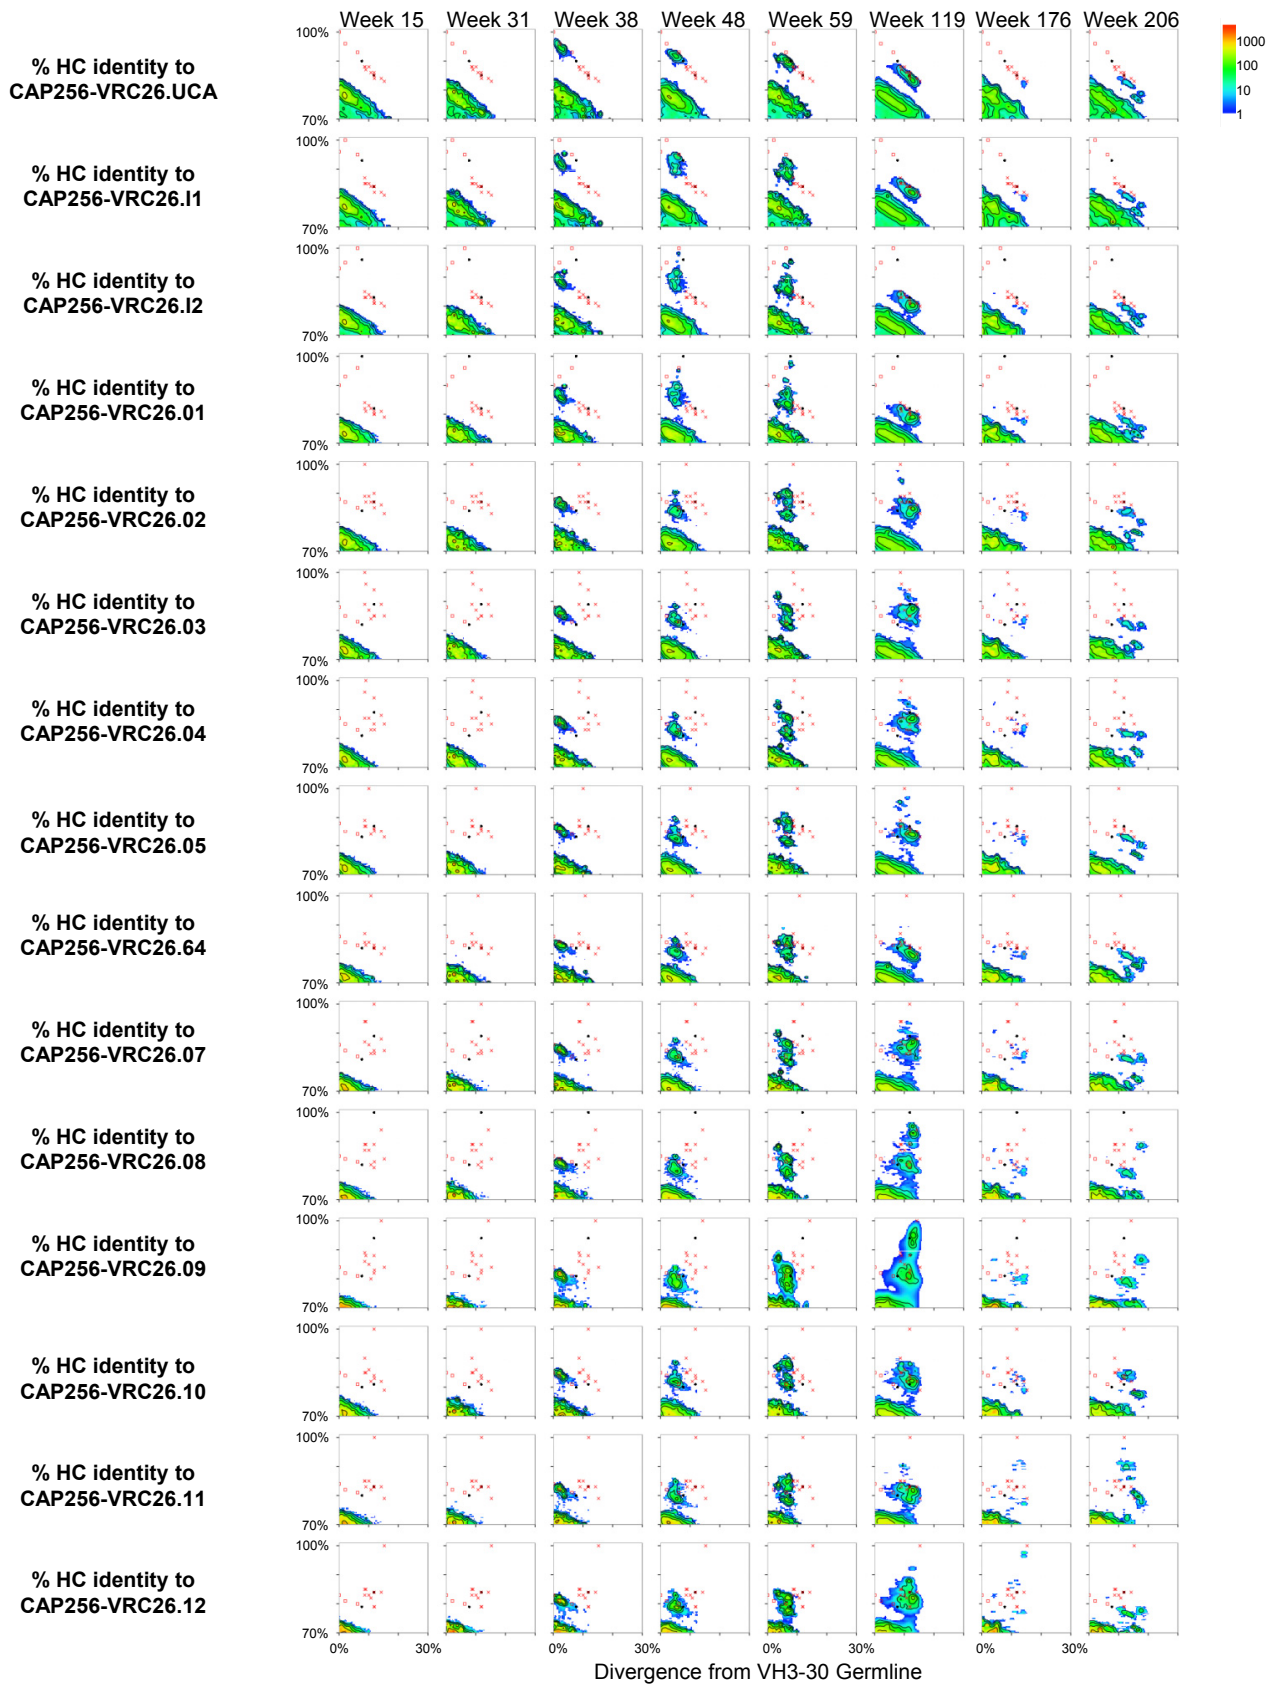

**Supplementary Figure 4A. Longitudinal heavy chain identity-divergence plots** for all 12 isolated antibodies, UCA, and inferred intermediates I1 and I2. CAP256-VRC26.O1 and CAP256-VRC26.O8 are shown as black dots; all other isolated antibodies are shown as red Xes; UCA, O1, and O2 are shown as open red squares.



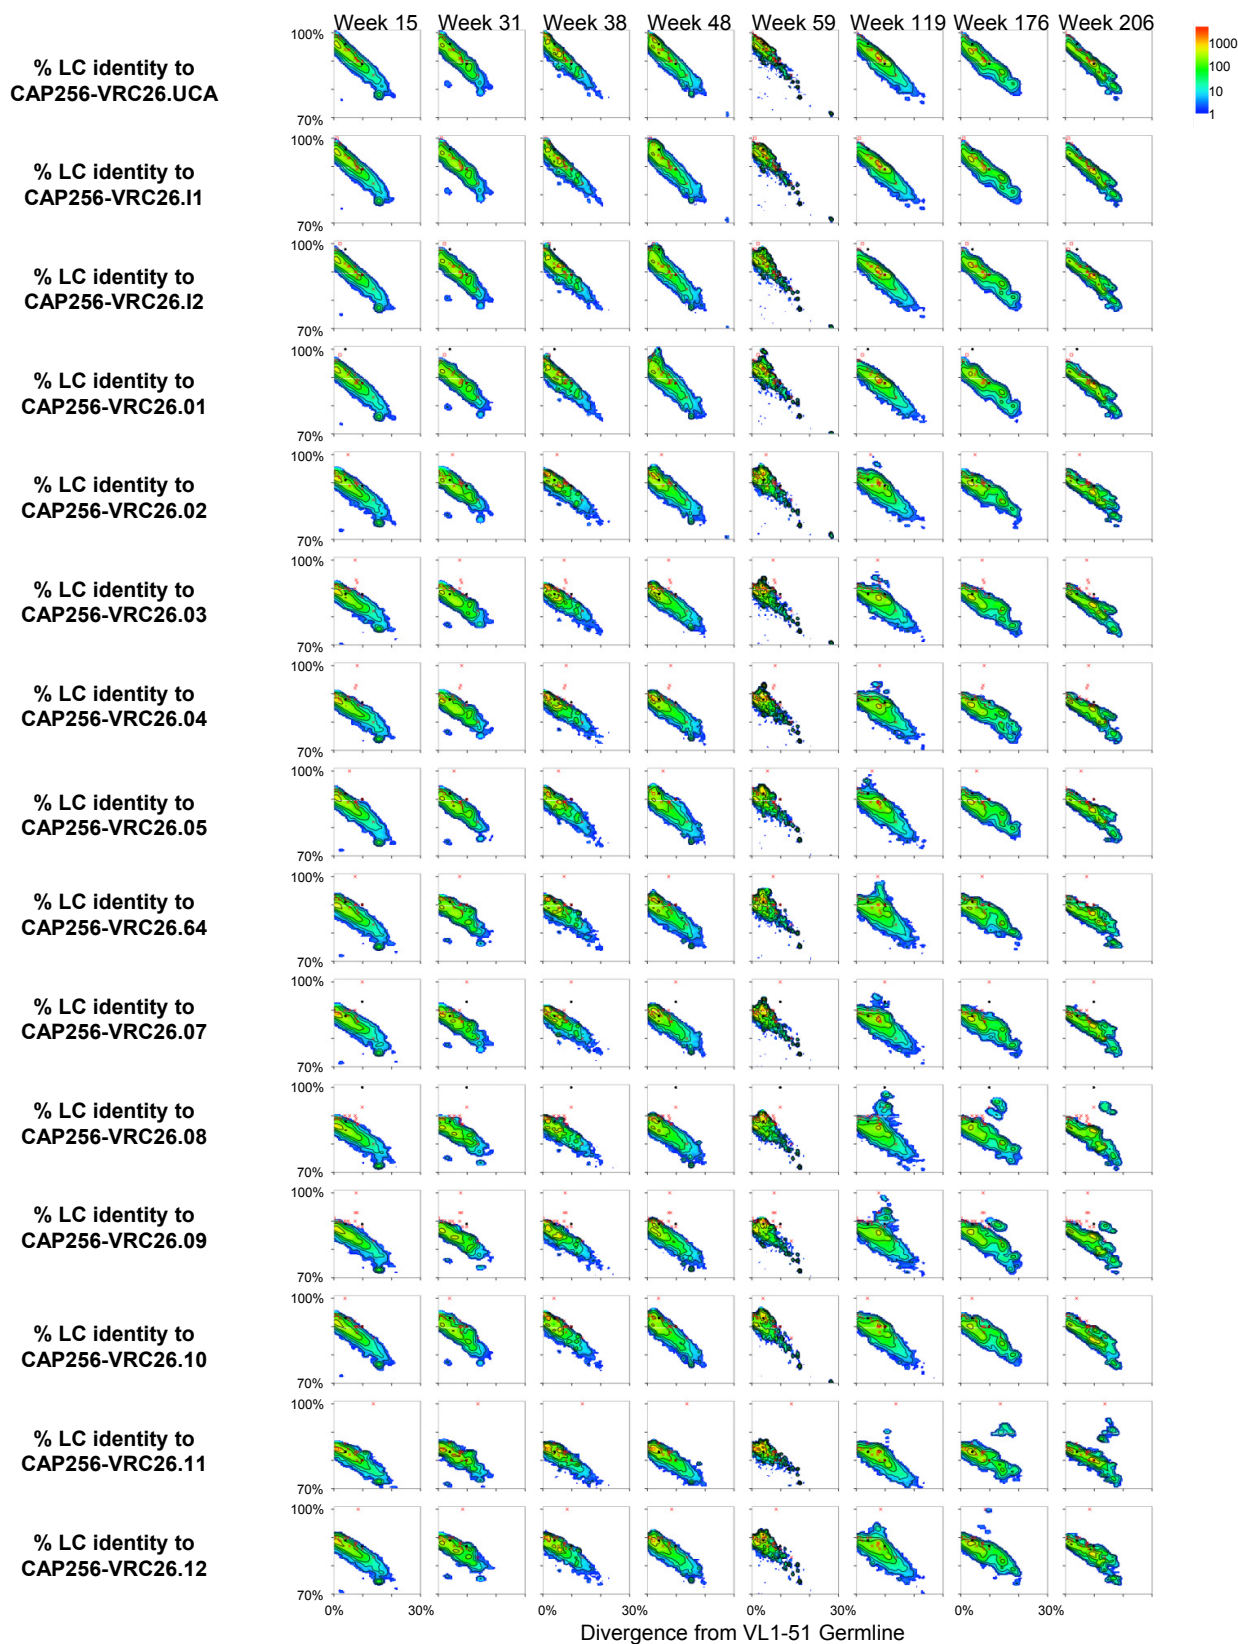

**Supplementary Figure 4B. Longitudinal light chain identity-divergence plots** for all 12 isolated antibodies, UCA, and inferred intermediates I1 and I2. CAP256-VRC26.O1 and CAP256-VRC26.O8 are shown as black dots; all other isolated antibodies are shown as red Xes; UCA, I1, and I2 are shown as open red squares. Unlike the heavy chain plots, most of the light chain plots do not show distinct islands, likely because light chains do not have the added junctional diversity of a D gene and thus share greater overall sequence homology, even among unrelated sequences.

**a**

```

IGHV3-30*18   CAGGTGCAGCTGGTGGAGTCTGGGGGAGGCGTGGTCCAGCCTGGGAGGTCCTGAGACTCTCCTGTGCAGCCTCTGGA
IGHD3-3*01    ~~~~~
IGHJ3*02      ~~~~~
UCA_heavy     .....

IGHV3-30*18   TTCACCTTCAGTAGCTATGGCATGCACTGGGTCCGCCAGGCTCCAGGCAAGGGGCTGGAGTGGGTGGCAGTTATATCA
IGHD3-3*01    ~~~~~
IGHJ3*02      ~~~~~
UCA_heavy     .....

IGHV3-30*18   TATGATGGAAGTAATAAATACTATGCAGACTCCGTGAAGGGCCGATTCCACATCTCCAGAGACAATTCCAAGAACACG
IGHD3-3*01    ~~~~~
IGHJ3*02      ~~~~~
UCA_heavy     .....

IGHV3-30*18   CTGTATCTGCAAATGAACAGCCTGAGAGCTGAGGACACGGCTGTGTATTACTGTGCGAAAGA~~~~~
IGHD3-3*01    ~~~~~
IGHJ3*02      ~~~~~
UCA_heavy     .....TCTGGGAGAAAGCGAA

IGHV3-30*18   ~~~~~
IGHD3-3*01    ~~~~~
IGHJ3*02      ~~~~~
UCA_heavy     AATGAAGAGTGGGCGACGGAT-.....C.T.....-----CCCTGGCCAAGACCCACGGGGCGTGG

IGHV3-30*18   ~~~~~
IGHD3-3*01    ~~~~~
IGHJ3*02      ~~~~~
UCA_heavy     TTGGA-----.....
    
```

**b**

```

IGLV1-51*02   CAGTCTGTGTTGACGCAGCCGCCCTCAGTGTCTGCGGCCCCAGGACAGAAAGTCCACATCTCCTGCTCTGGAAGCAGC
IGLJ1*01      ~~~~~
UCA_light     .....

IGLV1-51*02   TCCAACATTGGGAATAATTATGTATCCTGGTACCAGCAGCTCCCAGGAACAGCCCCAAACTCCTCATCTATGAAAAT
IGLJ1*01      ~~~~~
UCA_light     .....

IGLV1-51*02   AATAAGCGACCTCAGGGATTCTGACCGATTCTCTGGCTCCAAGTCTGGCACGTCAGCCACCCTGGGCATCACCGBA
IGLJ1*01      ~~~~~
UCA_light     .....

IGLV1-51*02   CTCCAGACTGGGGACGAGGCCGATTATTACTGCGGAACATGGGATAGCAGCCTGAGTGTGG-----
IGLJ1*01      ~~~~~
UCA_light     .....TTATGTCTTCGGA

IGLV1-51*02   ~~~~~
IGLJ1*01      ACTGGGACCAAGGTCACCGTCCTA
UCA_light     .....
    
```

**Supplementary Figure 5. VDJ recombination analysis for CAP256-VRC26 lineage.** Nucleotide sequence and recombination analysis of the calculated unmutated common ancestor (UCA) of the CAP256-VRC26 lineage. **a**, heavy chain. **b**, light chain. Nucleotides that were excised from the germline genes by recombination are indicated by red italics. Predicted P-insertions are in bold font and N-insertions are underlined. The heavy chain UCA had a complete 35 amino acid CDR H3, formed from a single D gene and N-insertions of 34 and 31 nucleotides in length.

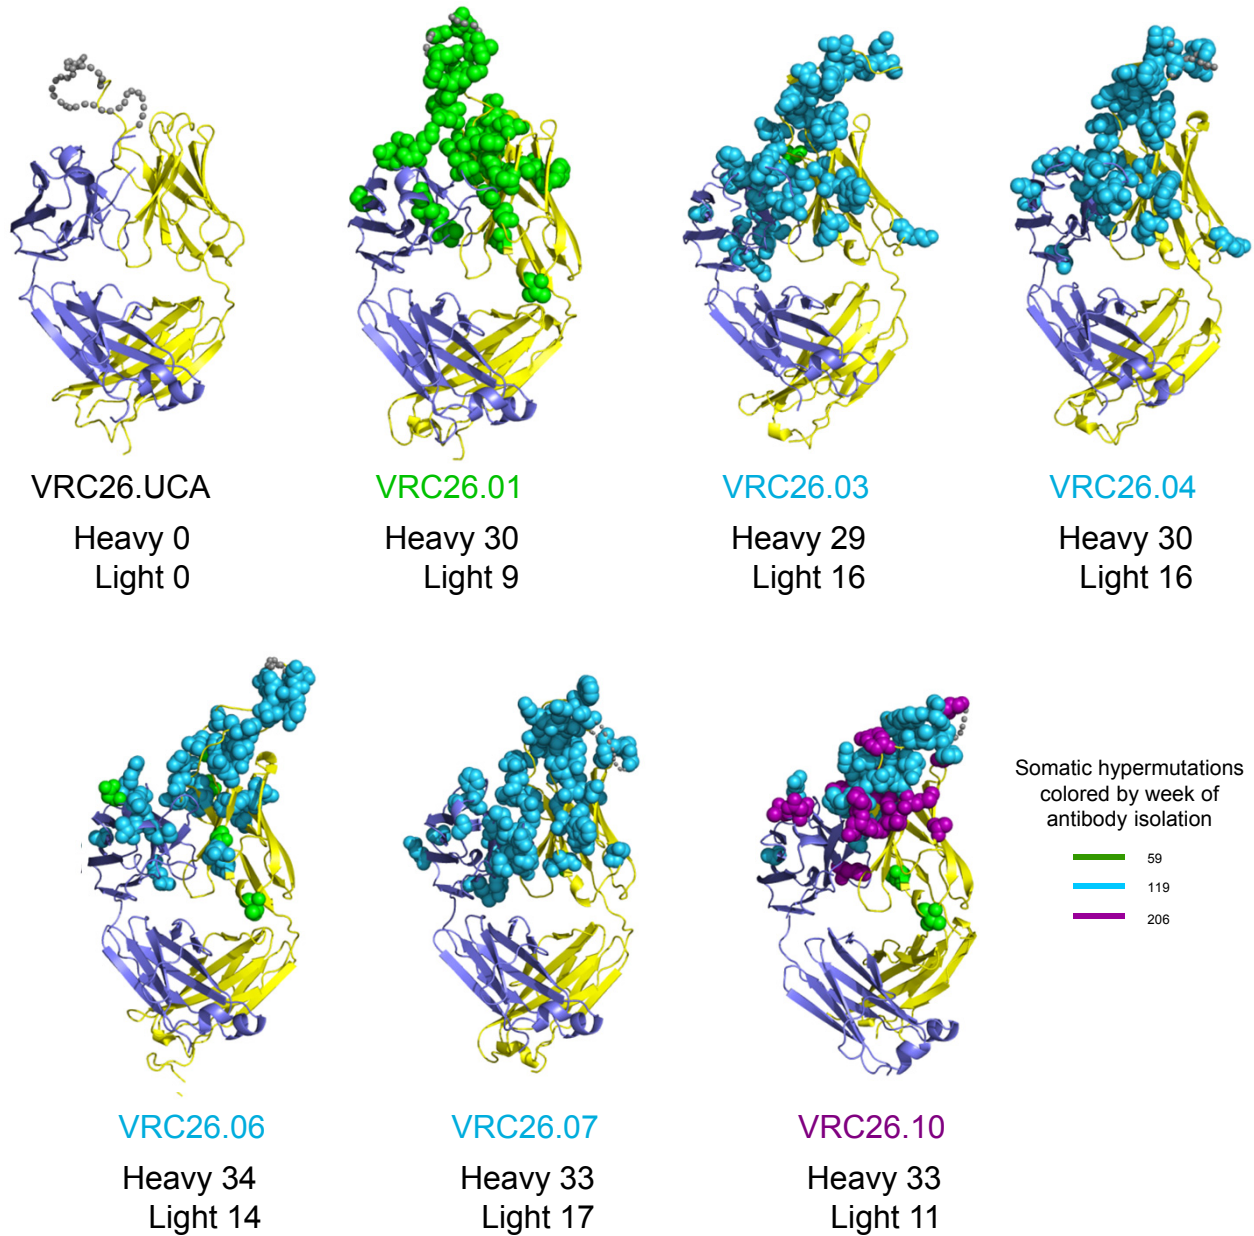

**Supplementary Figure 6A. Full Fab structures of CAP256-VRC26 antibodies highlighting somatic hypermutation by week of appearance.** The structures of antigen-binding fragments of CAP256-VRC26 antibodies are depicted in ribbon diagram representation with heavy chains in yellow and light chains in blue. Somatic hypermutations are shown in all atom representation, and colored according to the week post-infection from which they first appeared in isolated antibodies VRC26.01-12 (week 59, green; week 119, cyan; week 206, purple). Grey dashes indicate disordered regions of the CDR H3. The numbers of heavy and light chain mutations from the UCA are shown below the structures. See Fig. 4 for phylogenetic placement.

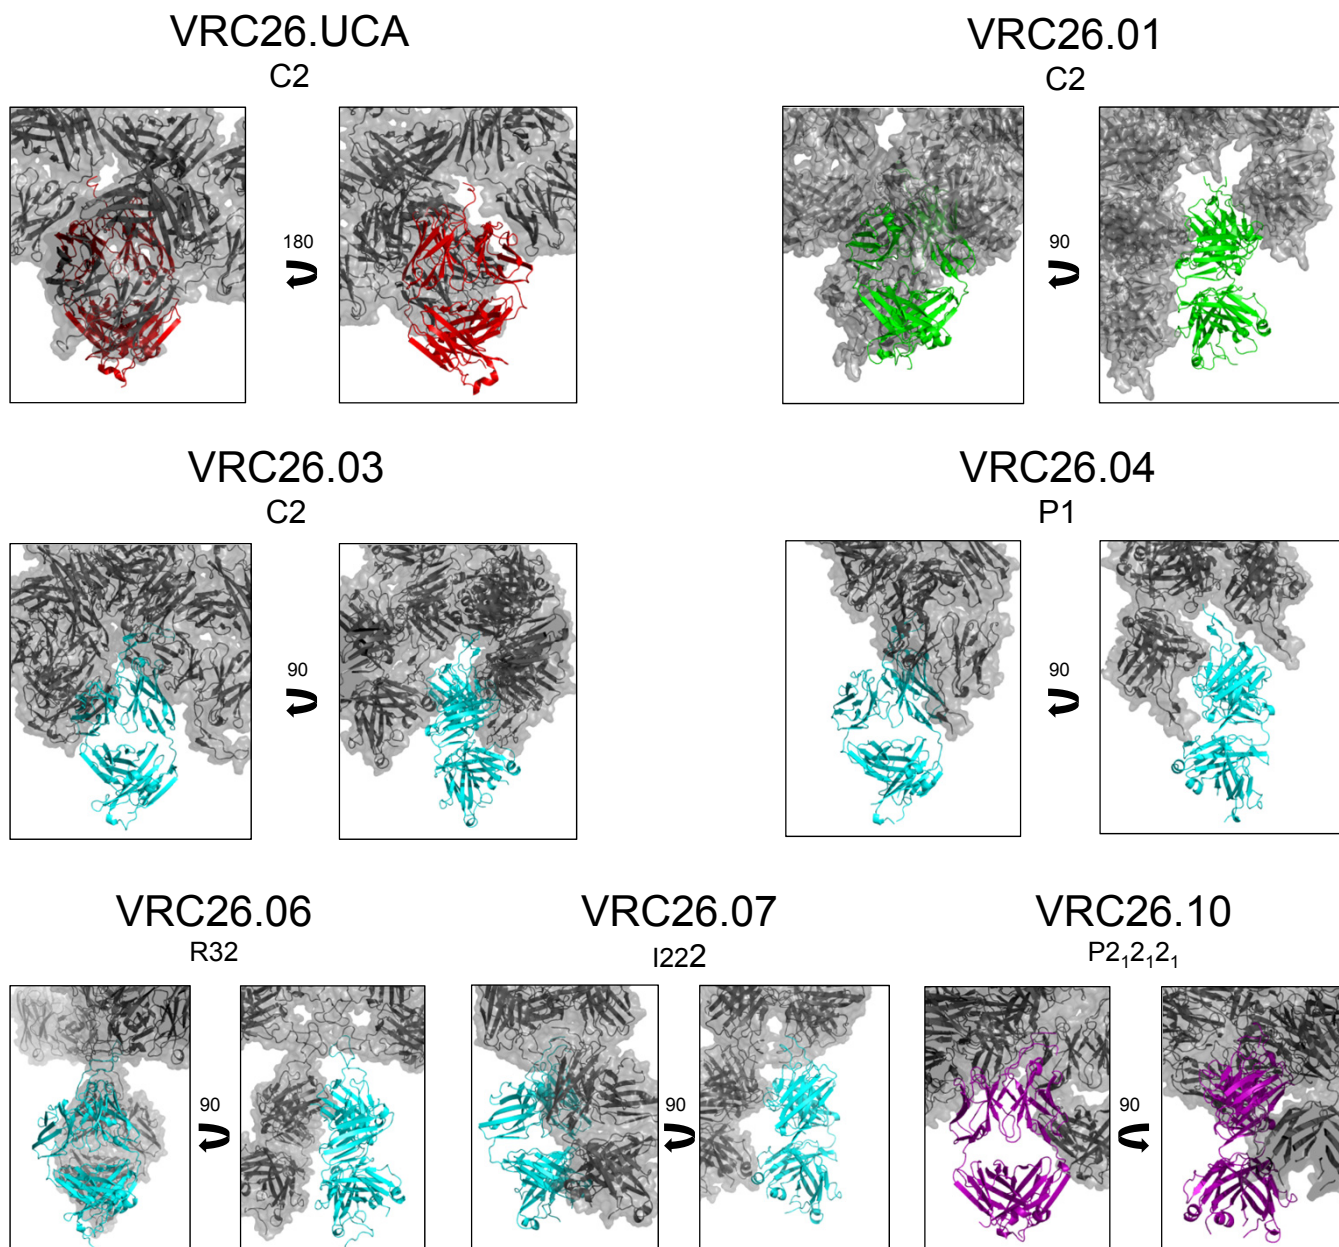

**Supplementary Figure 6B. Crystal packing of CAP256-VRC26 structures.** Each of the VRC26 Fab crystal structures are shown as ribbon diagrams. Neighboring molecules which pack close to the CDR H3 are displayed as grey ribbon diagrams with transparent surface representations. The space group for each structure is noted. Despite the variety of space groups and packing contacts, the five structures from later time points (cyan and purple) all display CDR H3 loops that protrude over the heavy chain.

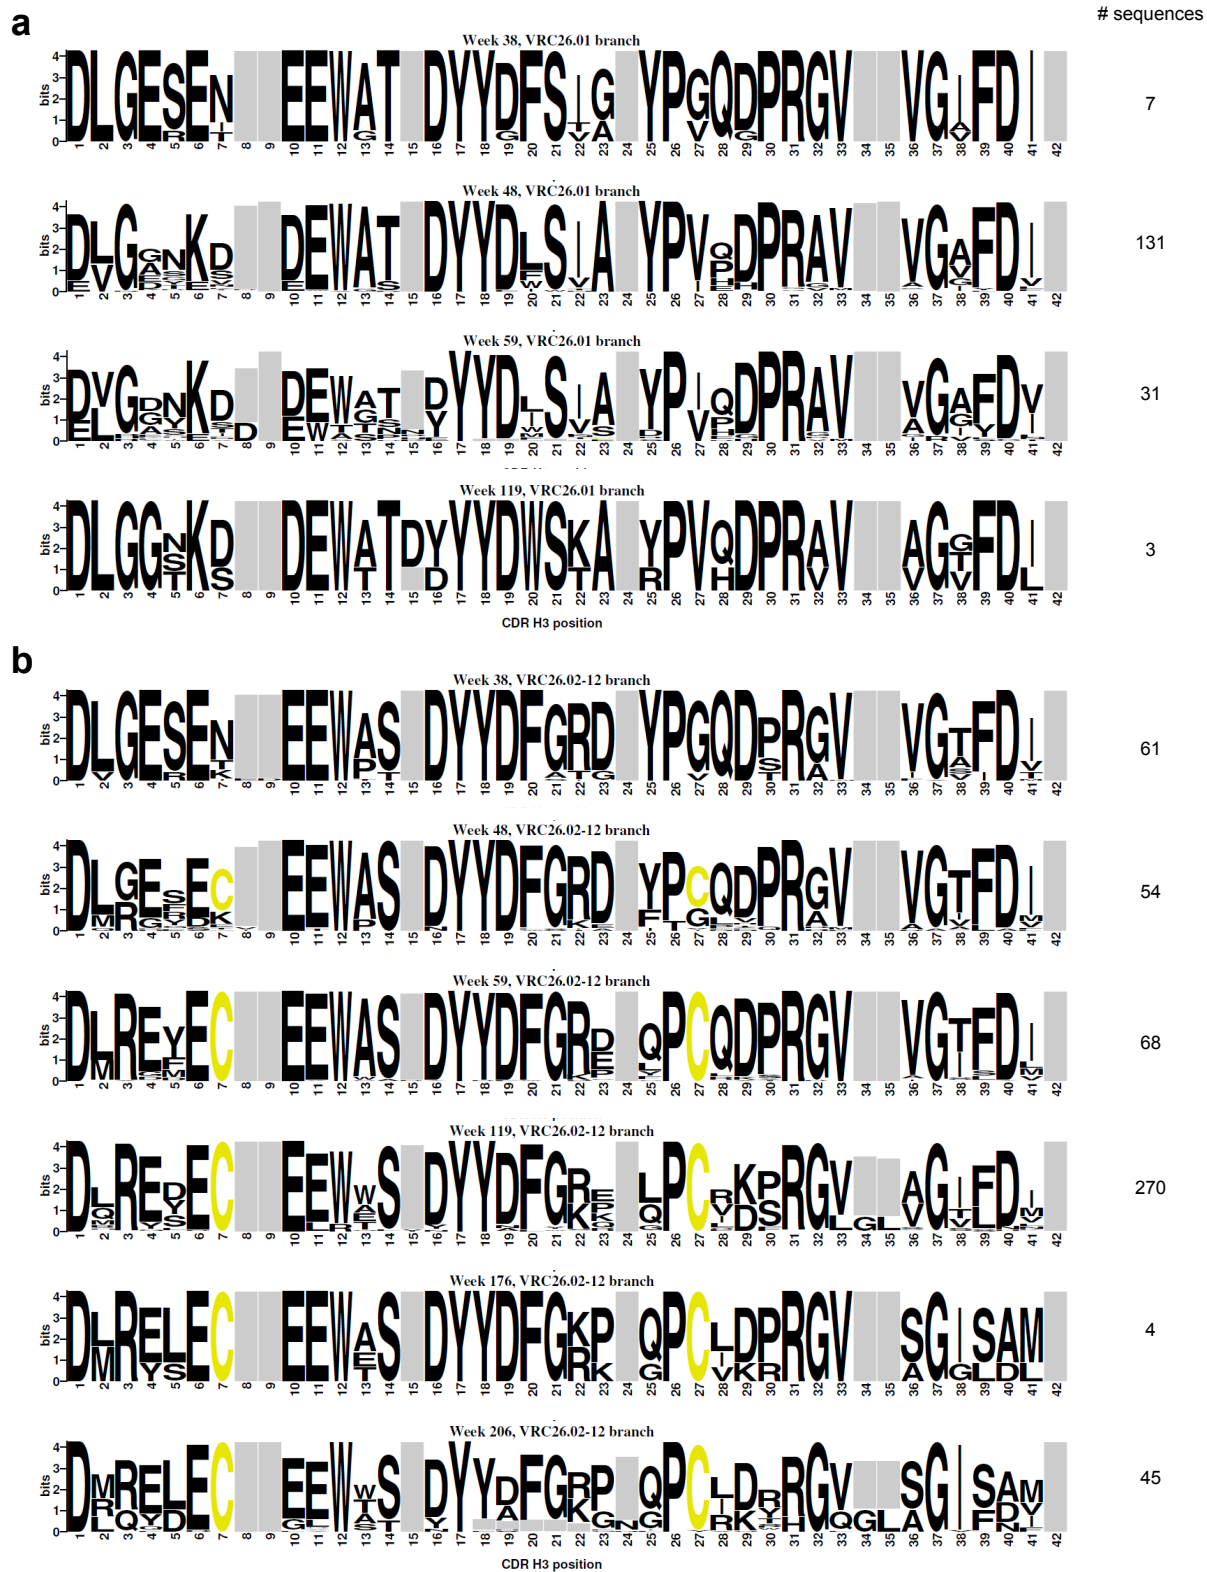

**Supplementary Figure 7. Logograms of CDR H3 sequences extracted from the heavy chain phylogenetic tree in Fig. 3c, segregated by time point and subfamily.** The letters in each stack represent the amino acids observed at that position, and the height of each letter is proportional to its frequency in the population. The cysteine residues that are part of a conserved disulfide bond are shown in yellow. Grey bars indicate gaps. **a**, CDR H3 sequences from the branch of the tree that includes CAP256-VRC26.01. **b**, CDR H3 sequences from the branch of the tree that includes all of the other isolated antibodies, CAP256-VRC26.02-12.

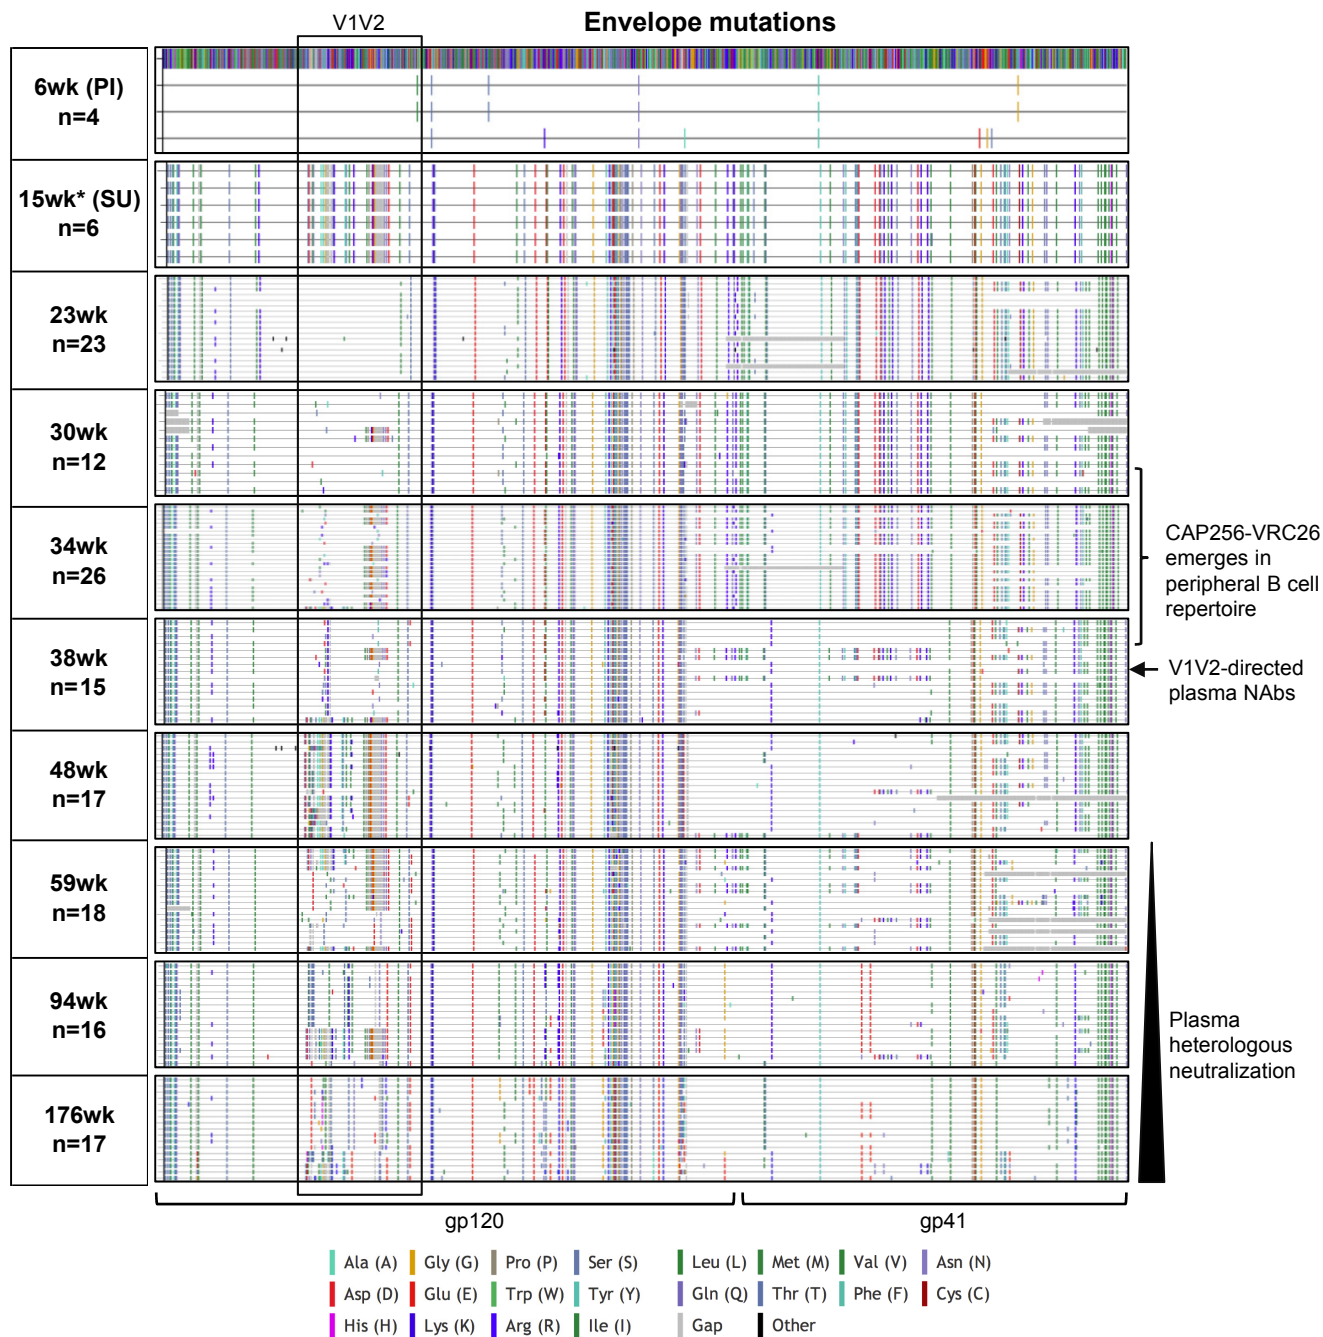

**Supplementary Figure 8. HIV-1 envelope gp160 sequences amplified from CAP256 donor, shown in highlighter format.** The primary infecting virus (PI) is designated as master (amino acid colors indicated in key) and the V1V2 region is boxed. The development of the CAP256-VRC26 antibody lineage, V1V2 plasma directed neutralizing antibodies, and plasma heterologous neutralization, are indicated on the right. Asterisk denotes sequences amplified with strain-specific primers matching the SU virus.

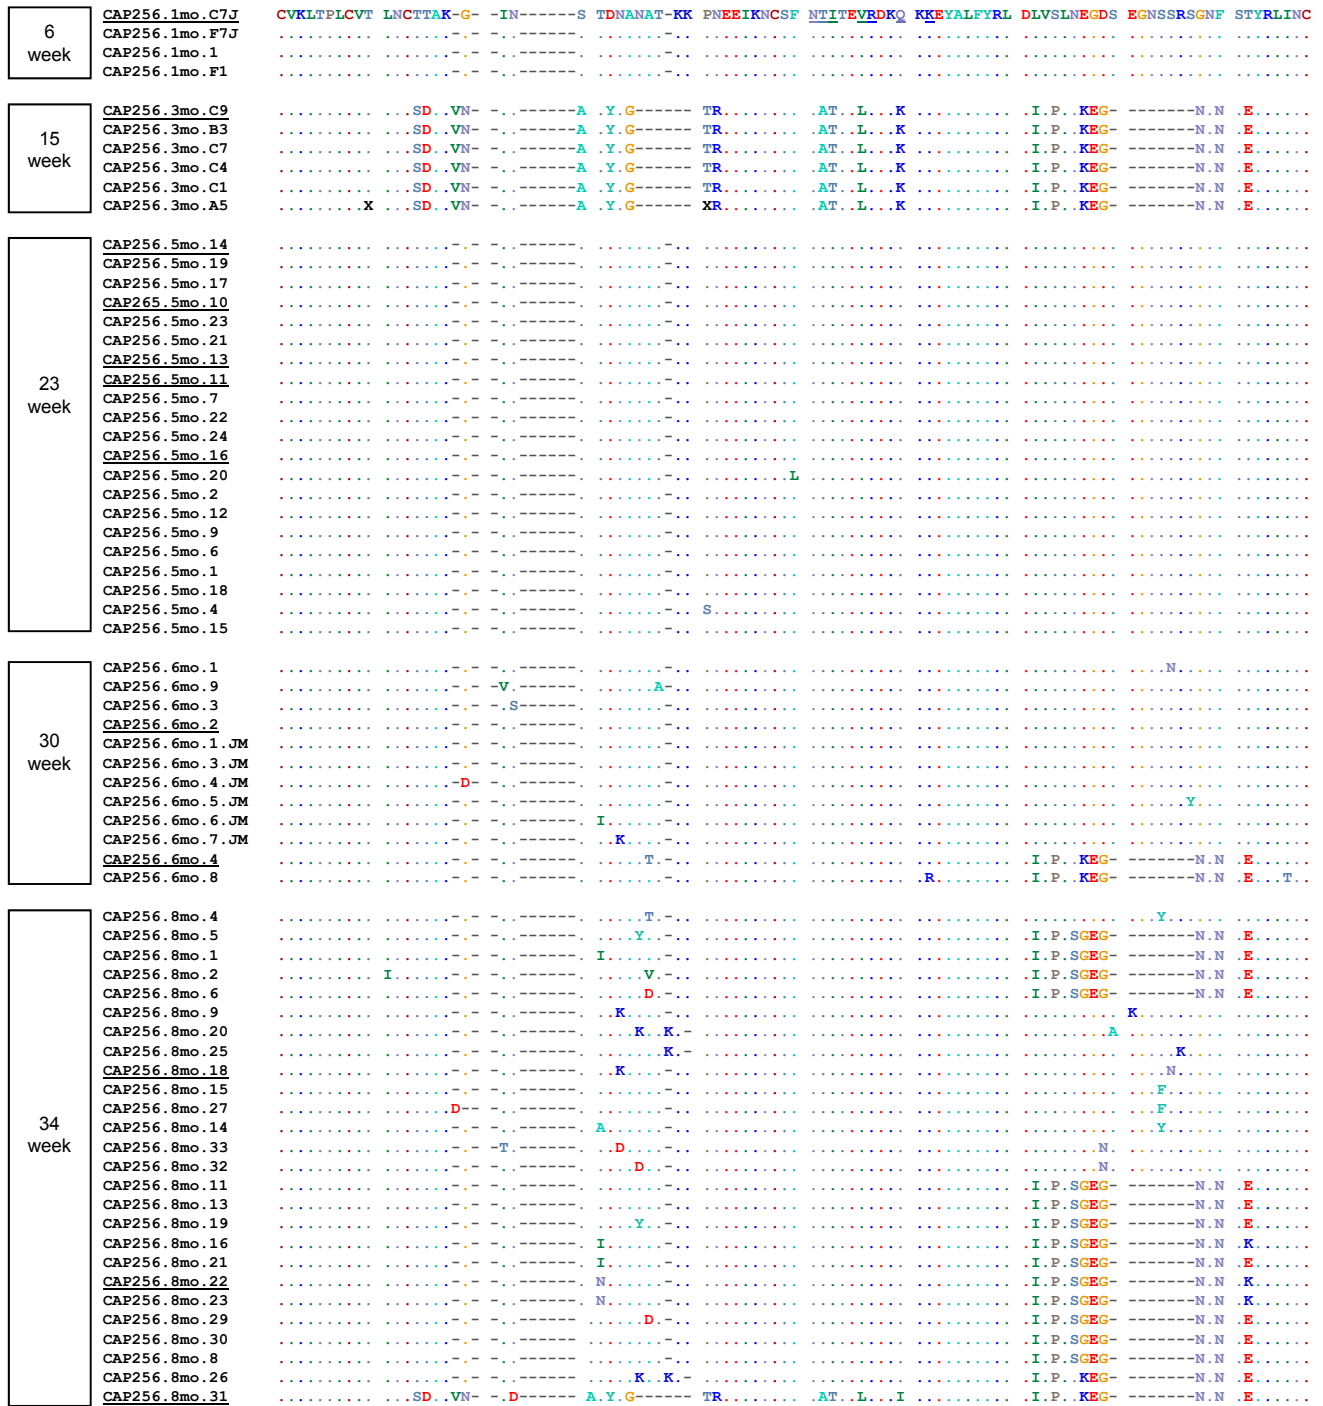

Supplementary Figure 9. HIV-1 envelope V1V2 sequences amplified from CAP256 donor, by week, with the primary infecting virus (PI) designated as master. Sequences cloned for neutralization assays are underlined. The location of key residues between 160 and 169 is highlighted.

# Supplementary Figure 9

|                |                                                                       |                                                                                                                                                                |
|----------------|-----------------------------------------------------------------------|----------------------------------------------------------------------------------------------------------------------------------------------------------------|
| 6 week         | CAP256.1mo.C7J                                                        | CVKLTPLCVT LNC <del>T</del> TAK-G- -IN-----S TDNANAT-KK PNEEIKNCSF <u>NTITFV</u> RD <del>KQ</del> <u>KKEYALFYRL</u> DLVSLNEGDS EGNSSRS <del>GNF</del> STYRLINC |
| 15 week        | CAP256.3mo.C9                                                         | .....SD.VN- -A.Y.G- -TR.....AT.L.L.K.....I.P.KEG- ----N.N.E.....                                                                                               |
| 38 week        | CAP256.9mo.26                                                         | .....T.T.K-.....N.....                                                                                                                                         |
|                | CAP256.9mo.39                                                         | .....K.R.....N.....                                                                                                                                            |
|                | CAP256.9mo.19                                                         | .....R.V.K.....N.....                                                                                                                                          |
|                | CAP256.9mo.14                                                         | .....E.K.....F.....                                                                                                                                            |
|                | CAP256.9mo.6                                                          | .....E.K.....F.....                                                                                                                                            |
|                | CAP256.9mo.20                                                         | .....E.K.....F.....                                                                                                                                            |
|                | CAP256.9mo.8                                                          | .....K.....F.....                                                                                                                                              |
|                | CAP256.9mo.21                                                         | .....S.K.....F.....                                                                                                                                            |
|                | CAP256.9mo.38                                                         | .....T.T.K.....E.....                                                                                                                                          |
|                | CAP256.9mo.10                                                         | .....T.K.....N.....                                                                                                                                            |
|                | CAP256.9mo.34                                                         | .....V.K.....N.....                                                                                                                                            |
| CAP256.9mo.40  | .....V.K.....Y.....                                                   |                                                                                                                                                                |
| CAP256.9mo.16  | .....V.K.....I.P.SGEG- ----N.N.E.....                                 |                                                                                                                                                                |
| CAP256.9mo.17  | .....D.....V.K.....I.P.SGEG- ----N.N.E.....                           |                                                                                                                                                                |
| CAP256.9mo.43  | .....SD.VN- -S- A.Y.G- -TR.....AT.L.L.I.....I.P.KEG- ----N.N.E.....   |                                                                                                                                                                |
| 48 week        | CAP256.12mo.17                                                        | .....E.....I.P.SGEG- ----N.N.E.....                                                                                                                            |
|                | CAP256.12mo.10                                                        | .....DSTDN- A.A- -T.....I.P.SGEG- ----N.N.E.....                                                                                                               |
|                | CAP256.12mo.13                                                        | .....X.....STDNAN AIY.G- -TR.....AT.L.L.I.....I.P.SGEG- ----N.N.E.....                                                                                         |
|                | CAP256.12mo.12                                                        | .....SD.VN- -VT- A.Y.G- -TR.....AT.L.L.I.....I.P.SGEG- ----N.N.E.....                                                                                          |
|                | CAP256.12mo.9                                                         | .....SD.VN- -A.Y.G- -TR.....AT.L.L.I.....I.P.SGEG- ----N.N.E.....                                                                                              |
|                | CAP256.12mo.2                                                         | .....SD.-N- A.Y.G- -TR.....AT.L.L.I.....I.P.SGEG- ----N.N.E.....                                                                                               |
|                | CAP256.12mo.14                                                        | .....SD.VN- -A.Y.G- -TR.....AT.L.L.I.....I.P.SGEG- ----N.N.E.....                                                                                              |
|                | CAP256.12mo.15                                                        | .....SD.VN- -S- A.Y.G- -TR.....AT.L.L.I.....I.P.SGEG- ----N.N.E.....                                                                                           |
|                | CAP256.12mo.16                                                        | .....SD.VN- -S- A.Y.G- -TR.....AT.L.L.I.....I.P.SGEG- ----N.N.E.....                                                                                           |
|                | CAP256.12mo.18                                                        | .....SD.VN- -S- A.Y.G- -TR.....AT.L.L.I.....I.P.SGEG- ----N.N.E.....                                                                                           |
|                | CAP256.12mo.1                                                         | .....SD.VN- -A.Y.G- -TR.....AT.L.L.I R.....I.P.SGEG- ----N.N.E.....                                                                                            |
|                | CAP256.12mo.11                                                        | .....SD.VN- -A.Y.G- -TR.....AT.L.L.I R.....I.P.SGEG- ----N.N.E.....                                                                                            |
|                | CAP256.12mo.19                                                        | .....SD.VN- -A.Y.G- -TR.....AT.L.L.I R.....I.P.SGEG- ----N.N.E.....                                                                                            |
|                | CAP256.12mo.5                                                         | .....SD.VN- -A.Y.G- -TR.....AT.L.L.I R.....I.P.SGEG- ----N.N.E.....                                                                                            |
|                | CAP256.12mo.8                                                         | .....SD.VN- -T- AIH.G- -TR.....AT.....R.....I.P.SGEG- ----N.N.E.....                                                                                           |
|                | CAP256.12mo.5                                                         | .....SD.VN- -T- AIH.G- -TR.....AT.....R.....I.P.SGEG- ----N.N.E.....                                                                                           |
| CAP256.12mo.3  | .....SD.VNE N- V.Y.G- -TR.....AT.....I R.....I.P.SGEG- ----N.N.E..... |                                                                                                                                                                |
| CAP256.12mo.4  | .....SD.VNE S- A.Y.G- -TR.....A.....I.P.SGEG- ----N.N.E.....          |                                                                                                                                                                |
| 59 week        | CAP256.14mo.10a                                                       | .....I.....T.....T.....N.....                                                                                                                                  |
|                | CAP256.14mo.4a                                                        | .....I.....I.....G.T.....T.....N.....                                                                                                                          |
|                | CAP256.14mo.6a                                                        | .....IN- -T.....T.....E.....N.....                                                                                                                             |
|                | CAP256.14mo.11a                                                       | .....T.....T.....E.....N.....                                                                                                                                  |
|                | CAP256.14mo.5a                                                        | .....T.....T.....E.....N.....                                                                                                                                  |
|                | CAP256.14mo.7a                                                        | .....T.....T.....E.....N.....                                                                                                                                  |
|                | CAP256.14mo.12a                                                       | .....D.....V.....I.P.SGEG- ----D.N.E.....                                                                                                                      |
|                | CAP256.14mo.9a                                                        | .....D.....I.....T.....T.....I.P.SGEG- ----N.N.E.....                                                                                                          |
|                | CAP256.14mo.2b                                                        | .....D.....S.....D.....I.P.SGEG- ----N.N.E.....                                                                                                                |
|                | CAP256.14mo.5b                                                        | .....D.....I.....T.....T.....I.P.SGEG- ----N.N.E.....                                                                                                          |
|                | CAP256.14mo.7b                                                        | .....D.....I.....T.L.I.....I.P.SGKG- ----N.N.E.....                                                                                                            |
|                | CAP256.14mo.6b                                                        | .....D.....I.....T.....I.P.SGEG- ----N.N.E.....                                                                                                                |
|                | CAP256.14mo.13B                                                       | .....D.....I.....T.....I.P.SGEG- ----N.N.E.....                                                                                                                |
|                | CAP256.14mo.10b                                                       | .....SD.N- -A.Y.G- -TR.....AT.....I.....I.P.SGEG- ----N.N.E.....                                                                                               |
|                | CAP256.14mo.4b                                                        | .....SD.N- -A.Y.G- -TR.....AT.....I.....I.P.SGEG- ----N.N.E.....                                                                                               |
|                | CAP256.14mo.2a                                                        | .....SDVN- -A.Y.G- -TR.....ATS.L.L.E.....I.P.SGEG- ----N.N.E.....                                                                                              |
|                | CAP256.14mo.1a                                                        | .....SD.N- -A.Y.G- -TR.....SAT.L.L.I.....I.P.SGEG- ----N.N.E.....                                                                                              |
| CAP256.14mo.8b | .....SD.NV- -A.Y.G- -TR.....E.....I.P.SGEG- ----N.N.E.....            |                                                                                                                                                                |



# Supplementary Figure 9

|                 |                                                                       |                                                                                                            |
|-----------------|-----------------------------------------------------------------------|------------------------------------------------------------------------------------------------------------|
| 6 week          | CAP256.1mo.C7J                                                        | CVKLTPLCVT LNCCTAK-G- -IN-----S TDNANAT-KK PNEEIKNCSF NTITEVRDKQ KKEYALFYRL DLVSLNEGDS EGNSSRSGNF STYRLINC |
| 15 week         | CAP256.3mo.C9                                                         | .....SD..VN- ------A..Y.G-----TR.....AT..L...K.....I.P..KEG-----N.N..E.....                                |
| 94 week         | CAP256.21mo.D12                                                       | .....IN-ST T.-----I.....T..LK..I.....-N.....E.....                                                         |
|                 | CAP256.21mo.A11b                                                      | .....IN-ST T.-----T.....IT.....I.....-N.....E.....                                                         |
|                 | CAP256.21mo.A3                                                        | .....IN-ST T.-----I.....T..LK..I.....T.....-N.....E.....                                                   |
|                 | CAP256.21mo.A6                                                        | .....IN-ST T.-----I.....T..LK..I.....T.....-N.....E.....                                                   |
|                 | CAP256.21mo.A1                                                        | .....IN-ST T.-----I..D.....T..LK..I.....-N.....E.....                                                      |
|                 | CAP256.21mo.F1                                                        | .....IN-ST T.-----I.....T..LK..I.....-N.....E.....                                                         |
|                 | CAP256.21mo.C4                                                        | .....IN-ST T.-----I.....T..LK..I.....-N.....E.....                                                         |
|                 | CAP256.21mo.B2                                                        | .....IN-ST T.-----I.....T..LK..I.....-N.....E.....                                                         |
|                 | CAP256.21mo.E12                                                       | .....IN-ST T.-----I.....T..LK..I.....-N.....E.....                                                         |
|                 | CAP256.21mo.B10                                                       | .....IN-ST T.-----I.....T..LK..I.....-N.....E.....                                                         |
|                 | CAP256.21mo.F4                                                        | .....SD.N---T.Y.G-----TR..T.....AT..K..I.....I.P.SGEG-----N-N..E.....                                      |
|                 | CAP256.21mo.C1                                                        | .....SD.N---T.Y.G-----TR..T.....AT..K..I.....I.P.SGEG-----N-N..E.....                                      |
|                 | CAP256.21mo.D6                                                        | .....SD.N---T.VAY.G-----TR..T.....AT..K..I.....I.P.SGEG-----N-N..E.....                                    |
|                 | CAP256.21mo.C2                                                        | .....SD.N---T.Y.G-----TR..T.....AT..K..I.....I.P.SGEG-----N-N..E.....                                      |
| CAP256.21mo.A1  | .....SD.N---T.Y.G-----TR..T.....AT..K..I.....I.P.SGEG-----K.N..E..... |                                                                                                            |
| CAP256.21mo.A11 | .....-D-----V-----T.....N.....-S..R.....                              |                                                                                                            |
| 176 week        | CAP256.39mo.C2                                                        | .....-D-----V.V---T.....S...N.....K.....-S..R.....                                                         |
|                 | CAP256.39mo.B1                                                        | .....-D-----V.V---T.....S...N.....K.....-S..R.....                                                         |
|                 | CAP256.39mo.E1                                                        | .....-D-T-----K.V---T.....S...N.....-S..R.....                                                             |
|                 | CAP256.39mo.H1                                                        | .....-D-----H.V.V---T.....S...N.....D---S..M.....                                                          |
|                 | CAP256.39mo.F10                                                       | .....-D-S-----H.V---T.....S...N.....-S..R.....                                                             |
|                 | CAP256.39mo.6                                                         | .....-D-N-----H.V---T.....S...N.....-S..R.....                                                             |
|                 | CAP256.39mo.8                                                         | .....-D-T-----H.V---T.....S...N.....-S..R.....                                                             |
|                 | CAP256.39mo.12                                                        | .....-D-----G.H.V---T.....S...N.....-S..R.....                                                             |
|                 | CAP256.39mo.13                                                        | .....-D-----G.V---T.....S...N.....-S..R.....                                                               |
|                 | CAP256.39mo.17                                                        | .....-D-----N.V---T.....S...N.....D---S..M.....                                                            |
|                 | CAP256.39mo.18                                                        | .....-D-----N.V---T.....S...N.....D---S..M.....                                                            |
|                 | CAP256.39mo.20                                                        | .....-D-----H.V---T.....S...N.....-S..R.....                                                               |
|                 | CAP256.39mo.F1                                                        | .....HIN-ST T.-----TV...YNG AR.....AT.....E.....-NS.....E.....                                             |
|                 | CAP256.39mo.4                                                         | .....HIN-ST T.-----TV...YNG AR.....AT.....E.....-NS.....E.....                                             |
|                 | CAP256.39mo.22                                                        | .....SDV---V.Y.G-----TK...R...AT.....E.....-NS.....E.....                                                  |
|                 | CAP256.39mo.10                                                        | .....SEV---V.Y.G-----TK...R...ATS.L...E.....-NS.....E.....                                                 |
| CAP256.39mo.11  | .....SD.N---RT---VAY.G-----TR.....AT.....E.....-NS.....E.....         |                                                                                                            |

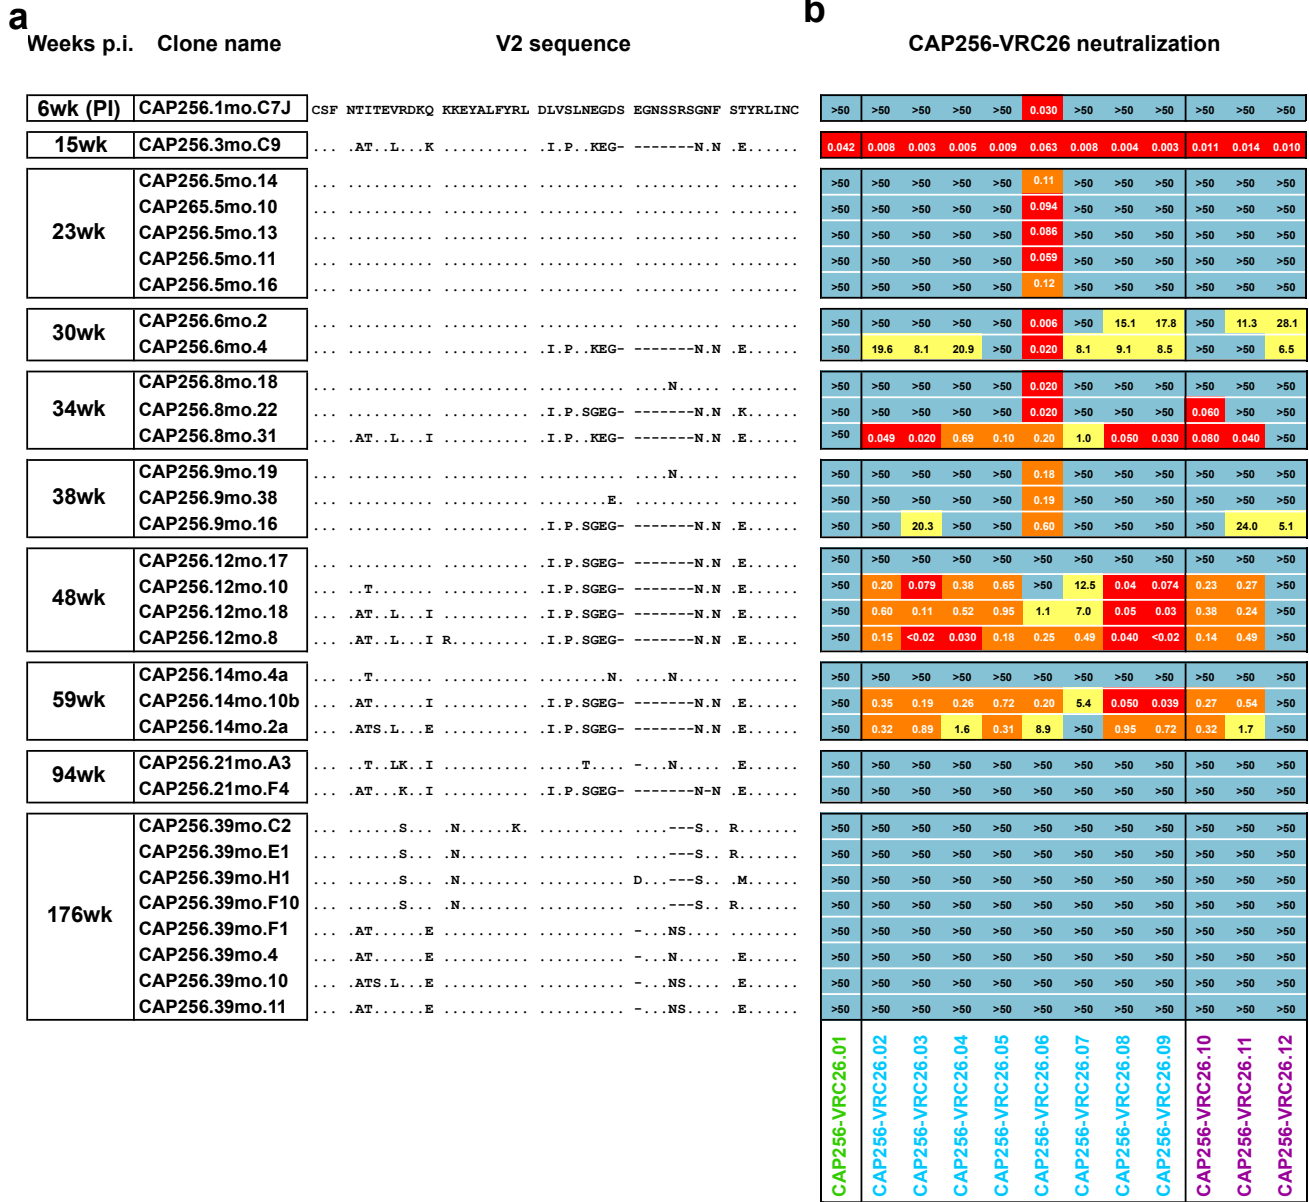

Supplementary Figure 10. Sequences of individual Env clones tested in Figure 5d. **a**, HIV-1 envelope clones by week, from 6 to 176 weeks post infection, with the amino acid sequence of the V1V2 region shown. **b**, Neutralization (IC<sub>50</sub> values) by each of the 12 CAP256-VRC26 mAbs tested against Env clones. The CAP256 mAbs are colored to indicate the time point when the sequences were first detected by next generation sequencing (as in Fig 3).

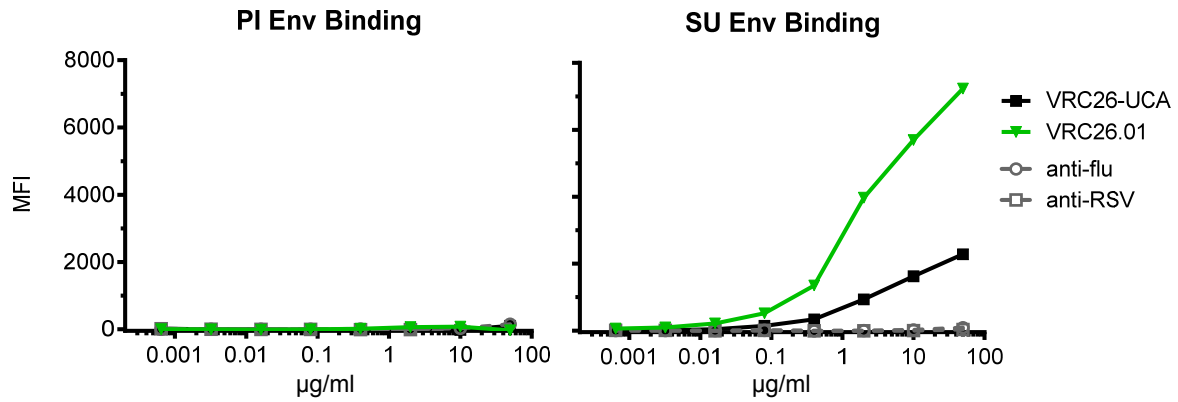

**Supplementary Figure 11. CAP256-VRC26 UCA does not bind to PI Env.** CAP256-VRC26 UCA and the early antibody CAP256-VRC26.01 bind to cell-surface expressed Env from the superinfecting virus (SU) but not the primary infecting virus (PI). Assay performed as in Figure 6. Assay shown is representative of 3 independent experiments. MFI, median fluorescence intensity.

Supplementary Table 1. Statistics for heavy-light chain paired deep sequencing.

| Time point | V-gene primers | PBMC recovered (viable/nonviable) | PBMC viability | Viable CD27+ B cells recovered* | Est. CD27+ B cells analyzed* | VRC-26 paired HC reads | 250bp reads post-QF (R1+R2) |
|------------|----------------|-----------------------------------|----------------|---------------------------------|------------------------------|------------------------|-----------------------------|
| wk34       | FR1**          | 12 m / 8 m                        | 60%            | 30k                             | 13 k                         | 0                      | 5,558,841                   |
|            | LP**           | <i>same as above</i>              | <i>above</i>   | <i>above</i>                    | 13 k                         | 0                      | 6,174,263                   |
| wk48       | FR1            | 2.9 m / 12.2 m                    | 19%            | 9 k                             | 8.1 k                        | 17762                  | 2,233,614                   |
| wk59       | FR1            | 6.7 m / 5.9 m                     | 53%            | 4.5 k                           | 4 k                          | 14                     | 5,623,331                   |
| wk69       | FR1            | 6.2 m / 5.0 m                     | 55%            | 31 k                            | 28 k                         | 158                    | 2,486,745                   |
| wk119      | FR1            | 5.1 m / 0.5 m                     | 89%            | 50 k                            | 23 k                         | 735                    | 5,523,921                   |
|            | LP             | <i>same as above</i>              | <i>above</i>   | <i>above</i>                    | 23 k                         | 18                     | 4,259,354                   |

\*CD27+ hemocytometer estimates

\*\* Primers shown in Supplementary Table 5

Supplementary Table 2. Crystallographic data collection and refinement statistics

Values in parentheses are for highest-resolution shell

|                                                         | VRC26.UCA              | VRC26.01                 | VRC26.03                 | VRC26.04                 | VRC26.06               | VRC26.07                | VRC26.10                  |
|---------------------------------------------------------|------------------------|--------------------------|--------------------------|--------------------------|------------------------|-------------------------|---------------------------|
| <b>Data collection</b>                                  |                        |                          |                          |                          |                        |                         |                           |
| Space group                                             | C2                     | C2                       | C2                       | P1                       | R32:H                  | I222                    | P212121                   |
| Cell constants                                          |                        |                          |                          |                          |                        |                         |                           |
| <i>a</i> , <i>b</i> , <i>c</i> (Å)                      | 85.5, 81.2, 69.2       | 104.4 71.2 82.9          | 99.2, 80.9, 87.6         | 68.0, 85.5,<br>103.3     | 253.5, 253.5,<br>70.1  | 70.1, 87.3,<br>224.4    | 43.4, 46.2,<br>232.5      |
| <i>a</i> , <i>b</i> , <i>g</i> (°)                      | 90.0, 124.0,<br>90.0   | 90.0, 93.3, 90           | 90.0, 116.7,<br>90.0     | 97.9, 107.7,<br>91.7     | 90.0, 90.0,<br>120.0   | 90.0, 90.0, 90.0        | 90.0, 90.0, 90.0          |
| Wavelength (Å)                                          | 1.00                   | 1.00                     | 1.00                     | 1.00                     | 1.00                   | 1.00                    | 1.00                      |
| Resolution (Å)                                          | 50.0-2.90<br>(3.0-2.9) | 50.0-1.90<br>(1.93-1.90) | 50.0-2.70<br>(2.75-2.70) | 50.0-3.15<br>(3.20-3.15) | 50.0-3.0<br>(3.11-3.0) | 40-2.6<br>(2.64-2.60)   | 50-1.91<br>(1.94-1.91)    |
| <i>R</i> <sub>merge</sub>                               | 11 (37)                | 8 (54)                   | 15(44)                   | 14(39)                   | 13(54)                 | 13(51)                  | 13(46)                    |
| <i>I</i> / <i>sI</i>                                    | 5.9 (1.8)              | 16.3 (2.1)               | 6.9(1.8)                 | 5.8(1.8)                 | 16.6(2.1)              | 12.5(1.7)               | 8.4(2.5)                  |
| Completeness (%)                                        | 85.7 (82.8)            | 100 (99.8)               | 88.4 (51.1)              | 95.9 (79.6)              | 98.8 (88.5)            | 93.9 (53.0)             | 65.2 (50)                 |
| Redundancy                                              | 2.3 (2.2)              | 3.7 (3.2)                | 2.9(1.7)                 | 1.9(1.8)                 | 10.0(5.0)              | 6.5(3.9)                | 4.1(3.9)                  |
| <b>Molecules/ASU</b>                                    |                        |                          |                          |                          |                        |                         |                           |
|                                                         | 1                      | 1                        | 1                        | 4                        | 1                      | 1                       | 1                         |
| <b>Refinement</b>                                       |                        |                          |                          |                          |                        |                         |                           |
| Resolution (Å)                                          | 33.1-2.9<br>(3.0-2.9)  | 34.7-1.90<br>(1.96-1.90) | 40.1-2.69<br>(2.79-2.69) | 35.63-3.12<br>(3.2-3.12) | 40.9-3.0<br>(3.1-3.0)  | 30.0-2.6<br>(2.71-2.62) | 32.77-1.90<br>(1.97-1.91) |
| Unique reflections                                      | 7,500 (660)            | 48,060 (3,241)           | 13,071(641)              | 36,806(2,685)            | 16,997(1,487)          | 19,901(1,816)           | 24,684(2,029)             |
| <i>R</i> <sub>work</sub> / <i>R</i> <sub>free</sub> (%) | 21.1/24.6              | 18/19.9                  | 20.3/24.5                | 25.6/28.5                | 19.3/23.3              | 22.1/24.5               | 21.0, 24.1                |
| No. atoms                                               |                        |                          |                          |                          |                        |                         |                           |
| Protein                                                 | 3249                   | 3324                     | 3447                     | 13,508                   | 3477                   | 3361                    | 3323                      |
| Water                                                   | 17                     | 197                      | 47                       | 0                        | 0                      | 17                      | 267                       |
| <i>B</i> -factors (Å <sup>2</sup> )                     |                        |                          |                          |                          |                        |                         |                           |
| Protein                                                 | 55.0                   | 33.3                     | 47.8                     | 51.3                     | 66.3                   | 36.2                    | 22.2                      |
| Water                                                   | 27.5                   | 43.7                     | 39                       | na                       | na                     | 33.2                    | 25.1                      |
| R.m.s. deviations                                       |                        |                          |                          |                          |                        |                         |                           |
| Bond lengths (Å)                                        | 0.004                  | 0.008                    | 0.003                    | 0.009                    | 0.003                  | 0.005                   | 0.005                     |
| Bond angles (°)                                         | .885                   | 1.22                     | 0.82                     | 1.15                     | 0.79                   | 1.01                    | .96                       |
| Ramachandran                                            |                        |                          |                          |                          |                        |                         |                           |
| Most favored regions (%)                                | 90.2                   | 98.2                     | 92.0                     | 91.0                     | 96.0                   | 92.5                    | 96.5                      |
| Additional allowed regions (%)                          | 9.4                    | 1.8                      | 7.8                      | 8.4                      | 3.8                    | 7.5                     | 3.3                       |
| Disallowed regions (%)                                  | 0.6                    | 0.0                      | 0.2                      | 0.6                      | 0.2                    | 0.0                     | 0.2                       |

**Supplementary Table 3.** Signals of selective pressure within in the V2 epitope (residues 160-171) of primary infecting (PI)-like and superinfecting (SU)-like viruses. Signals of selective pressure were detected at each site using MEME ( to detect episodic diversifying selection, with p values >0.05 considered significant) and DEPS (directional selection; maximum Bayes Factor >20 considered significant, with the preferred amino acid selected for indicated in parentheses).

| HXB2 position | Analysis* †         | Output                      | PI              | SU                |
|---------------|---------------------|-----------------------------|-----------------|-------------------|
| 160           | Directional (DEPS)  | Max BF                      | ns              | ns                |
|               | Diversifying (MEME) | P value                     | ns              | ns                |
| 161           | Directional (DEPS)  | Max BF                      | ns              | ns                |
|               | Diversifying (MEME) | P value                     | ns              | ns                |
| 162           | Directional (DEPS)  | Max BF                      | ns              | ns                |
|               | Diversifying (MEME) | P value                     | ns              | ns                |
| 163           | Directional (DEPS)  | Max BF                      | ns              | ns                |
|               | Diversifying (MEME) | P value                     | ns              | ns                |
| 164           | Directional (DEPS)  | Max BF                      | ns              | ns                |
|               | Diversifying (MEME) | P value                     | ns              | ns                |
| 165           | Directional (DEPS)  | Max BF (Preferred residues) | ns              | <b>191 (V)</b>    |
|               | Diversifying (MEME) | P value                     | ns              | ns                |
| 166           | Directional (DEPS)  | Max BF (Preferred residues) | <b>3403 (S)</b> | ns                |
|               | Diversifying (MEME) | P value                     | ns              | ns                |
| 167           | Directional (DEPS)  | Max BF                      | ns              | ns                |
|               | Diversifying (MEME) | P value                     | ns              | ns                |
| 168           | Directional (DEPS)  | Max BF                      | ns              | ns                |
|               | Diversifying (MEME) | P value                     | ns              | ns                |
| 169           | Directional (DEPS)  | Max BF (Preferred residues) | ns              | <b>77095 (IQ)</b> |
|               | Diversifying (MEME) | P value                     | ns              | <b>0.0001</b>     |
| 170           | Directional (DEPS)  | Max BF                      | ns              | ns                |
|               | Diversifying (MEME) | P value                     | ns              | ns                |
| 171           | Directional (DEPS)  | Max BF (Preferred residues) | <b>290 (K)</b>  | ns                |
|               | Diversifying (MEME) | P value                     | ns              | ns                |

\*DEPS ns = <20; †MEME ns = >0.05; BF = Bayes Factor

Supplementary Table 4. PCR Primers used to prepare amplicon for 454 pyrosequencing.

For all timepoints except week 176

Heavy Chain: VH3 only

**5' pool**

|                    |                                |                           |
|--------------------|--------------------------------|---------------------------|
| XLR-A_VH3 LEADER-A | CCATCTCATCCCTGCGTGTCTCCGACTCAG | TAAAAGGTGTCCAGTGT         |
| XLR-A_VH3 LEADER-B | CCATCTCATCCCTGCGTGTCTCCGACTCAG | TAAGAGGTGTCCAGTGT         |
| XLR-A_VH3 LEADER-C | CCATCTCATCCCTGCGTGTCTCCGACTCAG | TAGAAGGTGTCCAGTGT         |
| XLR-A_VH3 LEADER-D | CCATCTCATCCCTGCGTGTCTCCGACTCAG | GCTATTTTTAAAAGGTGTCCAGTGT |
| XLR-A_VH3 LEADER-E | CCATCTCATCCCTGCGTGTCTCCGACTCAG | TACAAGGTGTCCAGTGT         |
| XLR-A_VH3 LEADER-F | CCATCTCATCCCTGCGTGTCTCCGACTCAG | TAAAAGGTGTCCAGTGT         |

**3' pool**

|                      |                                |                                  |
|----------------------|--------------------------------|----------------------------------|
| XLR-B_3xwCgammaCH1-2 | CCTATCCCCTGTGTGCCTTGGCAGTCTCAG | GG GGA AGA CCG ATG GGC CCT TGG T |
| XLR-B_3CmuCH1        | CCTATCCCCTGTGTGCCTTGGCAGTCTCAG | GGGAATTCTCACAGGAGACGA            |

Lambda Chain

**5' pool**

|                  |                                |                          |
|------------------|--------------------------------|--------------------------|
| XLR-A_5L-VL1/2   | CCATCTCATCCCTGCGTGTCTCCGACTCAG | GCACAGGGTCCCTGGGCCAGTCTG |
| XLR-A_5L-VL3     | CCATCTCATCCCTGCGTGTCTCCGACTCAG | GCTCTGTGACCTCCATGAGCTG   |
| XLR-A_5L-VL4/5   | CCATCTCATCCCTGCGTGTCTCCGACTCAG | GGTCTCTCSCAGCYTGTGCTG    |
| XLR-A_5L-VL6     | CCATCTCATCCCTGCGTGTCTCCGACTCAG | GTTCTTGGGCCAATTTTATGCTG  |
| XLR-A_5L-VL7/8   | CCATCTCATCCCTGCGTGTCTCCGACTCAG | GAGTGGATPCTCAGACTGTGGTG  |
| XLR-A_5MP-VL1    | CCATCTCATCCCTGCGTGTCTCCGACTCAG | GCTCACTGCACAGGGTCTGGGCC  |
| XLR-A_5MP-VL3-1  | CCATCTCATCCCTGCGTGTCTCCGACTCAG | GCTTACTGCACAGGATCCGTGGCC |
| XLR-A_5MP-VL3-19 | CCATCTCATCCCTGCGTGTCTCCGACTCAG | ACTCTTTGCATAGGTTCTGTGGTT |
| XLR-A_5MP-VL3-21 | CCATCTCATCCCTGCGTGTCTCCGACTCAG | TCTCACTGCACAGGCTCTGTGACC |
| XLR-A_5MP-VL7-43 | CCATCTCATCCCTGCGTGTCTCCGACTCAG | ACTTGCTGCCAGGGTCCAATTC   |

**3' primer**

|           |                                |                         |
|-----------|--------------------------------|-------------------------|
| XLR-B_3CL | CCTATCCCCTGTGTGCCTTGGCAGTCTCAG | CACCAGTGTGGCCTTGTGGCTTG |
|-----------|--------------------------------|-------------------------|

Used for week 176 sample only

Heavy Chain: Vh\_all

**5' pool**

|                   |                                |                            |
|-------------------|--------------------------------|----------------------------|
| XLR-A_5L-VH1      | CCATCTCATCCCTGCGTGTCTCCGACTCAG | ACAGGTGCCACTCCCAGGTGCAG    |
| XLR-A_5L-VH3      | CCATCTCATCCCTGCGTGTCTCCGACTCAG | AAGGTGTCCAGTGTGARGTGCAG    |
| XLR-A_5L-VH4/6    | CCATCTCATCCCTGCGTGTCTCCGACTCAG | CCCAGATGGGTCTTCCCAGGTGCAG  |
| XLR-A_5L-VH5      | CCATCTCATCCCTGCGTGTCTCCGACTCAG | CAAGGAGTCTGTCCAGGTGCAG     |
| XLR-A_5xwL-VH1    | CCATCTCATCCCTGCGTGTCTCCGACTCAG | GCAGCCACAGGTGCCCACTCC      |
| XLR-A_5xwL-VH1-24 | CCATCTCATCCCTGCGTGTCTCCGACTCAG | CAGCAGCTACAGGCACCCACGC     |
| XLR-A_5xwL-VH1-69 | CCATCTCATCCCTGCGTGTCTCCGACTCAG | GGCAGCAGCTACAGGTGTCCAGTCC  |
| XLR-A_VH3-L1-MP   | CCATCTCATCCCTGCGTGTCTCCGACTCAG | GCTATTTTTAAAAGGTGTCCAATGT  |
| XLR-A_VH3/4-L1-MP | CCATCTCATCCCTGCGTGTCTCCGACTCAG | GTGGCAGTCCCAGATGGGTCTGTCT  |
| XLR-A_VH3/4-L3-MP | CCATCTCATCCCTGCGTGTCTCCGACTCAG | GTTGCAGTTTTAAAAGGTGTCCAGTG |
| XLR-A_VH5-L1-MP   | CCATCTCATCCCTGCGTGTCTCCGACTCAG | GCTGTCTCCAAGGAGTCTGTTC     |

**3' pool**

|                    |                                |                            |
|--------------------|--------------------------------|----------------------------|
| XLR-B_3xwCgammaCH1 | CCTATCCCCTGTGTGCCTTGGCAGTCTCAG | GGGGAAGACCGATGGGCCCTTGGTGG |
| XLR-B_3CmuCH1      | CCTATCCCCTGTGTGCCTTGGCAGTCTCAG | GGGAATTCTCACAGGAGACGA      |

Light Chains (kappa+lambda)

**5' pool**

|                  |                                |                            |
|------------------|--------------------------------|----------------------------|
| XLR-A_5xwL-VK1/2 | CCATCTCATCCCTGCGTGTCTCCGACTCAG | ATGAGGSTCCCYGCTCAGCTCCTGGG |
| XLR-A_5L-VK3     | CCATCTCATCCCTGCGTGTCTCCGACTCAG | CTTCTCCTCTGCTACTCTGGTCCCAG |
| XLR-A_5L-VK4     | CCATCTCATCCCTGCGTGTCTCCGACTCAG | ATTTCTCTGTGCTCTGGATCTCTG   |
| XLR-A_5L-VL1/2   | CCATCTCATCCCTGCGTGTCTCCGACTCAG | GCACAGGGTCCCTGGGCCAGTCTG   |
| XLR-A_5L-VL3     | CCATCTCATCCCTGCGTGTCTCCGACTCAG | GCTCTGTGACCTCCATGAGCTG     |
| XLR-A_5L-VL4/5   | CCATCTCATCCCTGCGTGTCTCCGACTCAG | GGTCTCTCSCAGCYTGTGCTG      |
| XLR-A_5L-VL6     | CCATCTCATCCCTGCGTGTCTCCGACTCAG | GTTCTTGGGCCAATTTTATGCTG    |
| XLR-A_5L-VL7/8   | CCATCTCATCCCTGCGTGTCTCCGACTCAG | GAGTGGATPCTCAGACTGTGGTG    |
| XLR-A_5MP-VL1    | CCATCTCATCCCTGCGTGTCTCCGACTCAG | GCTCACTGCACAGGGTCTGGGCC    |
| XLR-A_5MP-VL3-1  | CCATCTCATCCCTGCGTGTCTCCGACTCAG | GCTTACTGCACAGGATCCGTGGCC   |
| XLR-A_5MP-VL3-19 | CCATCTCATCCCTGCGTGTCTCCGACTCAG | ACTCTTTGCATAGGTTCTGTGGTT   |
| XLR-A_5MP-VL3-21 | CCATCTCATCCCTGCGTGTCTCCGACTCAG | TCTCACTGCACAGGCTCTGTGACC   |
| XLR-A_5MP-VL7-43 | CCATCTCATCCCTGCGTGTCTCCGACTCAG | ACTTGCTGCCAGGGTCCAATTC     |

**3' pool**

|              |                                |                            |
|--------------|--------------------------------|----------------------------|
| XLR-B_3xwCK1 | CCTATCCCCTGTGTGCCTTGGCAGTCTCAG | CAGCAGGCACACAACAGAGGCAGTTC |
| XLR-B_3CL    | CCTATCCCCTGTGTGCCTTGGCAGTCTCAG | CACCAGTGTGGCCTTGTGGCTTG    |

**Supplementary Table 5.** Additional primers used in Heavy-light chain paired deep sequencing.

| Conc (nM) | Primer ID              | Primer Sequence                                                               |
|-----------|------------------------|-------------------------------------------------------------------------------|
| 40        | VH1_LP                 | tattcccatcgcggcgcACAGGTGCCCACTCCCAGGTGCAG                                     |
| 40        | VH3_LP                 | tattcccatcgcggcgcAAGGTGTCCAGTGTGARGTGCAG                                      |
| 40        | VH4/6_LP               | tattcccatcgcggcgcCCCAGATGGGTCTGTCCAGGTGCAG                                    |
| 40        | VH5_LP                 | tattcccatcgcggcgcCAAGGAGTCTGTTCCGAGGTGCAG                                     |
| 40        | hV $\lambda$ 1for_LP   | gcgccgcgatgggaataNNNNNNNNNNNNNNNTCTGCTCGAGTTCGGTCAGGTCCTGGGCCAGTCTGTGCTG      |
| 40        | hV $\lambda$ 2for_LP   | gcgccgcgatgggaataNNNNNNNNNNNNNNNTCTGCTCGAGTTCGGTCAGGTCCTGGGCCAGTCTGCCCTG      |
| 40        | hV $\lambda$ 3for-2_LP | gcgccgcgatgggaataNNNNNNNNNNNNNNNTCTGCTCGAGTTCGGTCAYWCTGCACAGGCTCTGTGACCTCCTAT |
| 40        | hV $\lambda$ 4/5for_LP | gcgccgcgatgggaataNNNNNNNNNNNNNNNTCTGCTCGAGTTCGGTCAGGTCCTCTCSCAGCYTGTGCTG      |
| 40        | hV $\lambda$ 6for_LP   | gcgccgcgatgggaataNNNNNNNNNNNNNNNTCTGCTCGAGTTCGGTCAGTCTTTGGGCCAATTTTATGCTG     |
| 40        | hV $\lambda$ 7for_LP   | gcgccgcgatgggaataNNNNNNNNNNNNNNNTCTGCTCGAGTTCGGTCAGGTCCAATTCYCAGGCTGTGGTG     |
| 40        | hV $\lambda$ 8for_LP   | gcgccgcgatgggaataNNNNNNNNNNNNNNNTCTGCTCGAGTTCGGTCAGAGTGGATTCTCAGACTGTGGTG     |
| 40        | hV $\kappa$ 1/2for_LP  | gcgccgcgatgggaataNNNNNNNNNNNNNNNTCTGCTCGAGTTCGGTCAATGAGGSTCCCYGCTCAGCTGCTGG   |
| 40        | hV $\kappa$ 3for_LP    | gcgccgcgatgggaataNNNNNNNNNNNNNNNTCTGCTCGAGTTCGGTCACTCTTCTCTGCTACTCTGGCTCCCAG  |
| 40        | hV $\kappa$ 4for_LP    | gcgccgcgatgggaataNNNNNNNNNNNNNNNTCTGCTCGAGTTCGGTCAATTTCTCTGTTGCTCTGGATCTCTG   |
